# Supplementary material
Source: PubMed Central journal article supplement (PMC4677907)
Supplement: supp_pp.15.01170_PP2015-01170R2_Supplemental_Material.pdf [file supp_pp.15.01170_PP2015-01170R2_Supplemental_Material.pdf]

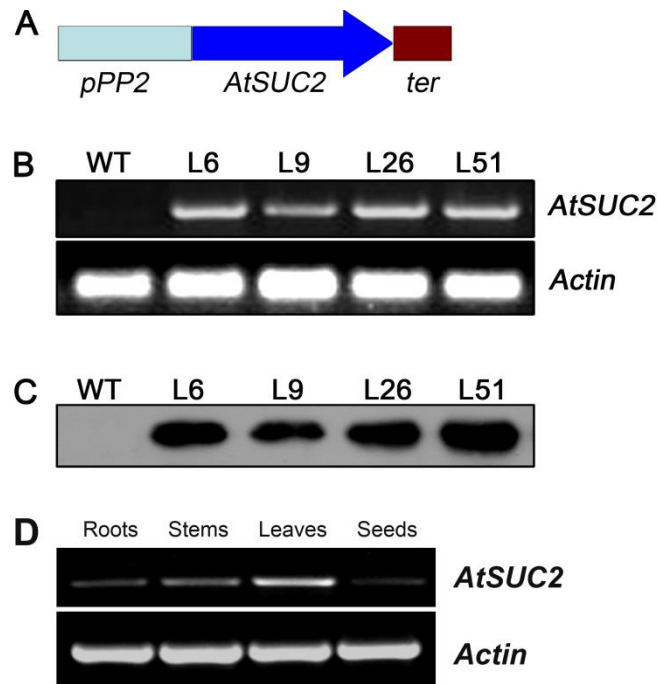

**Supplemental Figure S1.** Characterization of *pPP2::AtSUC2* rice plants.

(A) Schematic map of the construct used in *AtSUC2*-overexpressing. (B) RT-PCR analyses in flag leaves of wild-type (WT) and transgenic plants on the 10<sup>th</sup> d after fertilization. RT-PCR was performed with specific primers for *Arabidopsis* SUC2 and actin-specific primers. (C) Immunoblot analysis of AtSUC2 protein on the basis of equal total leaf proteins (15 µg) in flag leaves of wild-type (WT) and transgenic plants 10 days after fertilization. (D) RT-PCR analyses in flag leaves, roots, stems, flowers, and seeds of transgenic plants (line 51) on the 10<sup>th</sup> d after fertilization. RT-PCR was performed with specific primers for *Arabidopsis* SUC2 and actin-specific primers.

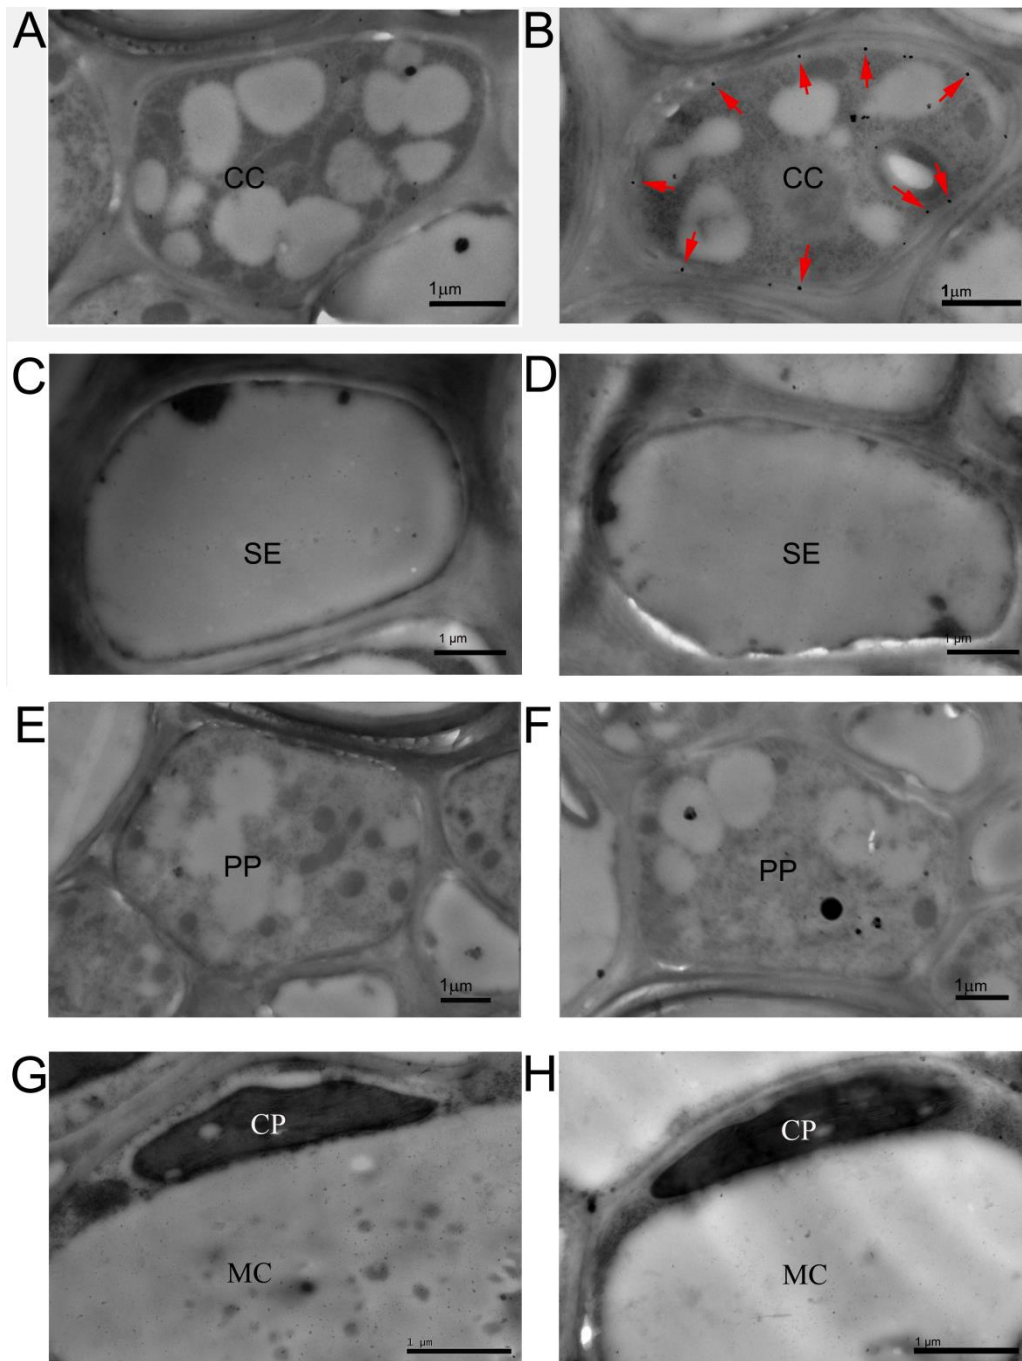

**Supplemental Figure S2.** Localization of AtSUC2 in leaves of wild-type (WT) and *pPP2::AtSUC2* rice plants (line 51).

AtSUC2 was localized by immunogold labeling and transmission electron microscopy. Arrows indicate gold particles conjugated to an anti-AtSUC2 polyclonal antibody. Bars = 1  $\mu\text{m}$ . SE, the sieve element; CC, the companion cell; PP, the phloem parenchyma cell; CP, the chloroplast. **(A)** Detection of AtSUC2 in companion cells in WT leaves. **(B)** Detection of AtSUC2 in companion cells in L51 leaves. **(C)** Detection of AtSUC2 in sieve element cells in WT leaves. **(D)** Detection of AtSUC2 in sieve element cells in L51 leaves. **(E)** Detection of AtSUC2 in phloem parenchyma cells in

WT leaves. **(F)** Detection of AtSUC2 in phloem parenchyma cells in L51 leaves. **(G)** Detection of AtSUC2 in mesophyll cells in WT leaves. **(H)** Detection of AtSUC2 in mesophyll cells in L51 leaves.

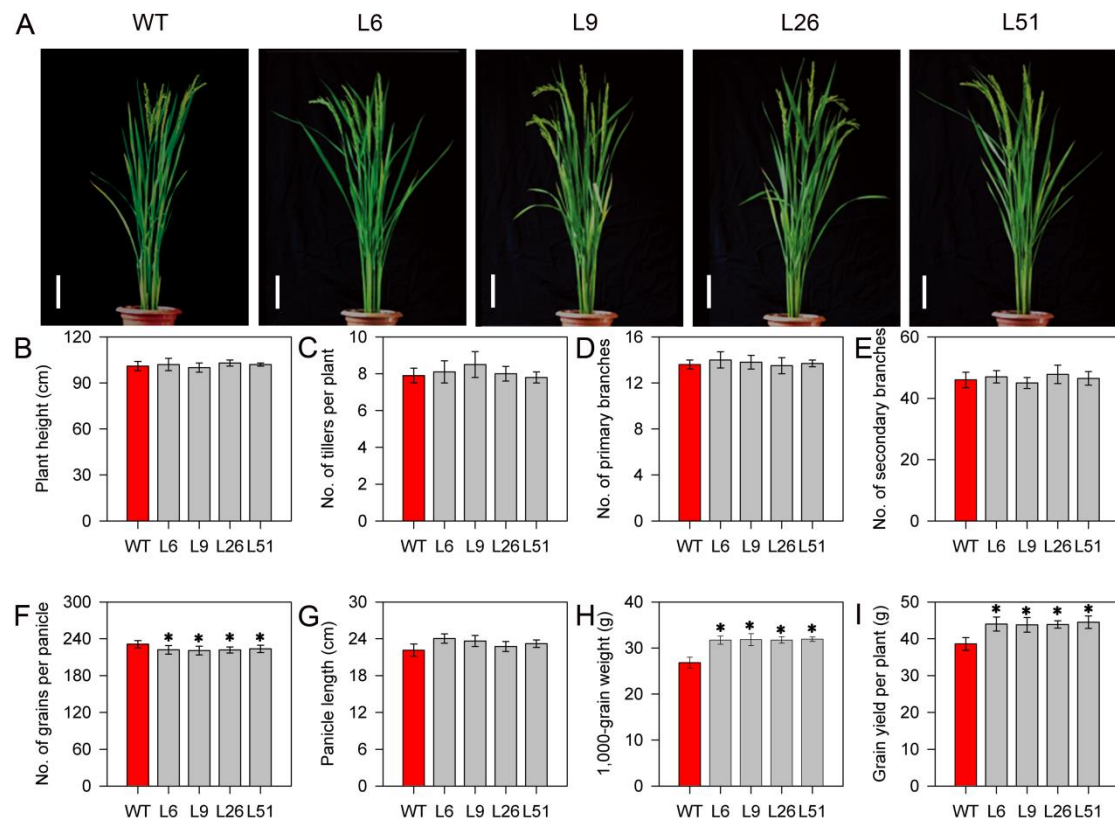

**Supplemental Figure S3.** Phenotype and grain yield of wild-type (WT) and *pPPP2::AtSUC2* rice plants.

All data are given as mean  $\pm$  SD. Asterisks indicate significant difference from the wild-type (\*\*  $P < 0.05$ , \*\*\*  $P < 0.01$ ). A Student's *t*-test was used to generate the *P* values. (A) Mature plant appearance. Bars = 10 cm. (B) Plant height (n = 60). (C) Number of tillers per plants (n = 60). (D) Number of primary branches (n = 60). (E) Number of secondary branches (n = 60). (F) Number of grains per panicle (n = 60). (G) Panicle length (n = 60). (H) 1000-grain weight (n = 60). (I) Grain yield per plant (n = 60).

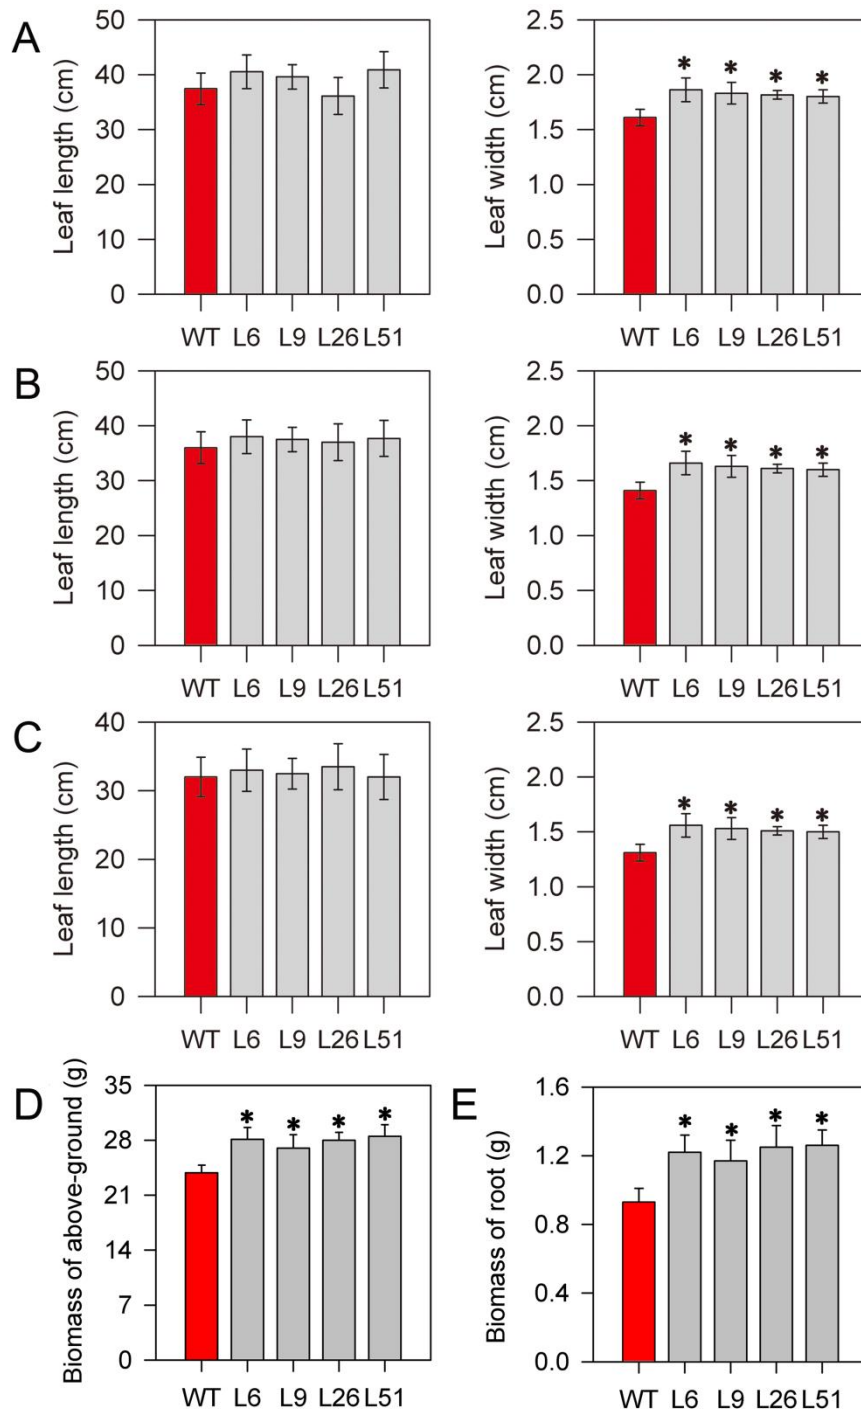

**Supplemental Figure S4.** Leaf length and width and biomass of wild-type (WT) *pPP2::AtSUC2* rice plants.

All data are given as mean  $\pm$  SD. Asterisks indicate significant difference from the wild-type (\*  $P < 0.05$ ). A Student's *t*-test was used to generate the *P* values.

- (A) Flag leaf length and width (n = 60). (B) Top second leaf length and width (n = 60). (C) Top third leaf length and width (n = 60). (D) Biomass of above-ground (n = 60). (E) Biomass of roots (n = 60).

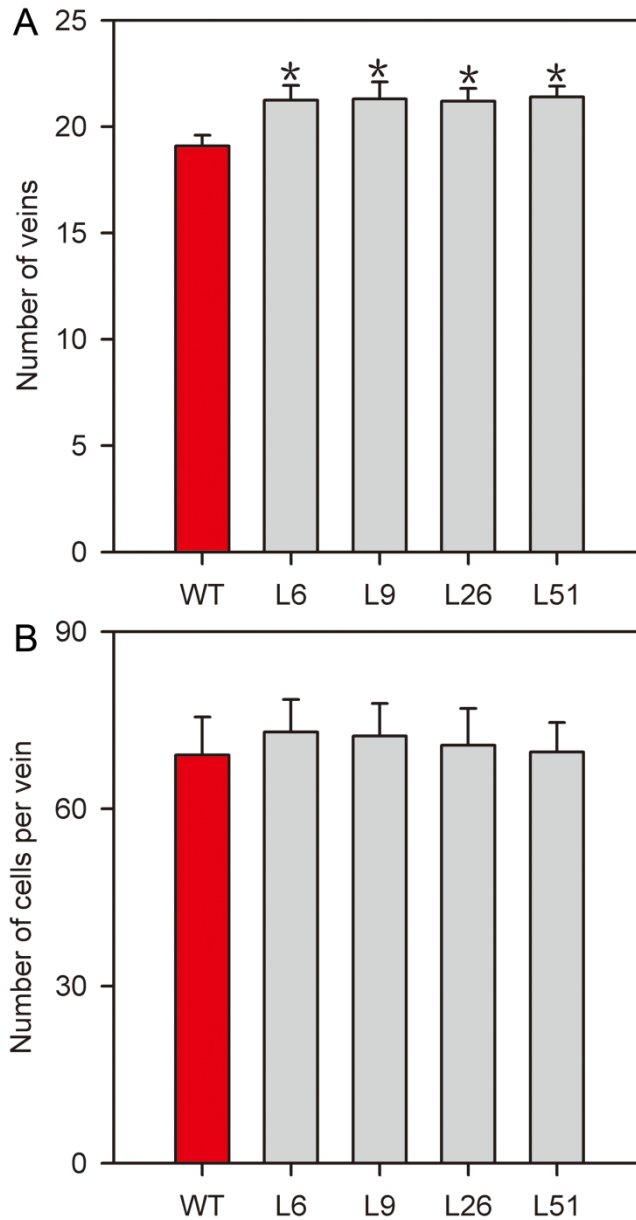

**Supplemental Figure S5.** Histological analyses of flag leaves on the 10<sup>th</sup> day after fertilization in wild-type (WT) and *pPP2::AtSUC2* rice plants.

All data are given as mean  $\pm$  SD. Asterisks indicate significant difference from the wild-type (\*  $P < 0.05$ ). A Student's *t*-test was used to generate the *P* values. **(A)** Number of veins at cross-section of the middle of flag leaves in WT and transgenic plants (n=5). **(B)** Average number of upper epidermal cells per vein at cross-section of the middle of flag leaves in WT and transgenic plants (n=5).

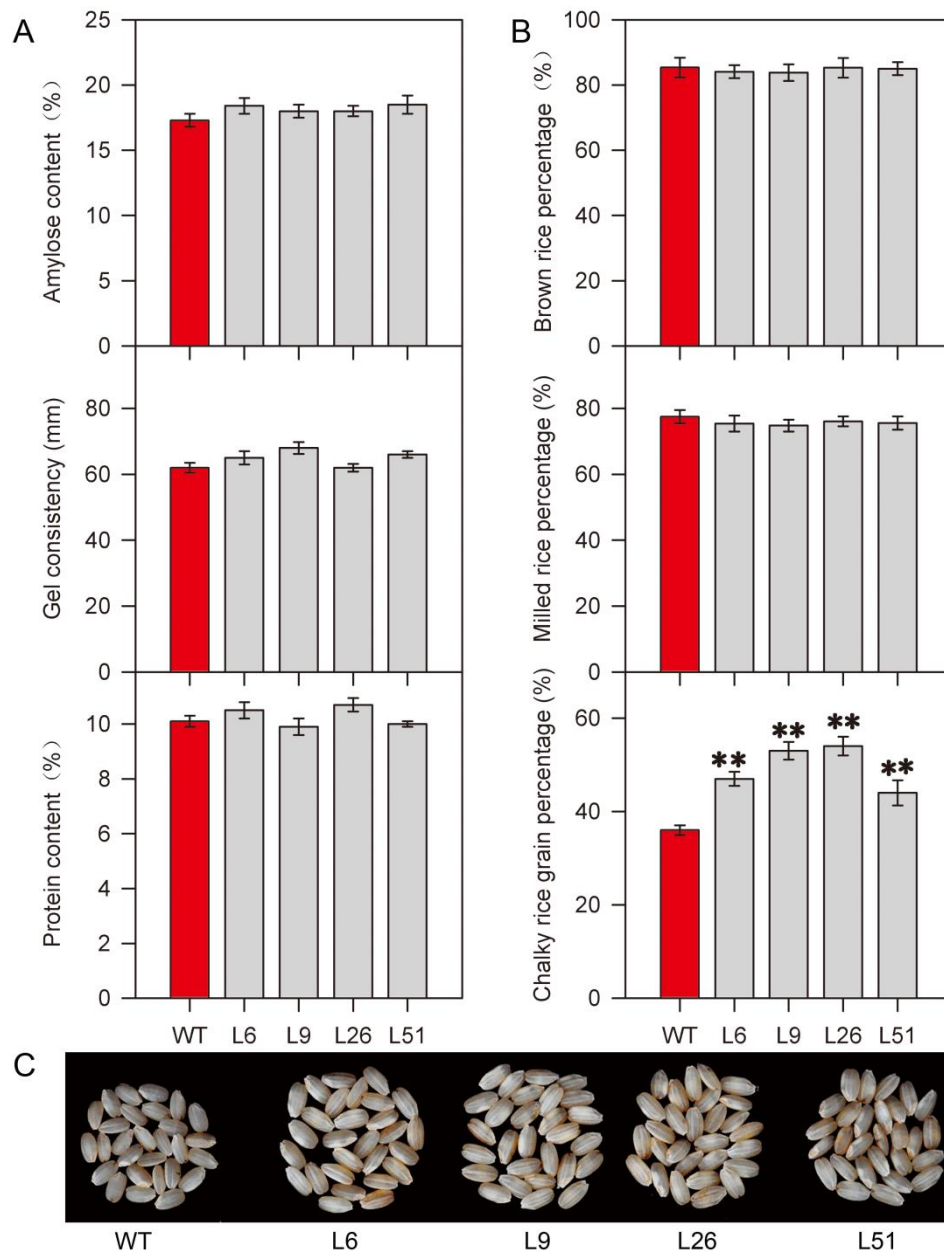

**Supplemental Figure S6.** Comparisons of grain quality traits between wild-type (WT) *pPPP2::AtSUC2* rice plants.

All data are given as mean  $\pm$  SD. Asterisks indicate significant difference from the wild-type (\*\*  $P < 0.01$ ). A Student's *t*-test was used to generate the *P* values. **(A)** Three physicochemical traits of rice grains: amylose content, gel consistency, and protein content ( $n = 6$ ). **(B)** Milling quality trait and appearance quality trait: brown rice percentage, milled rice percentage, and chalky rice percentage ( $n = 6$ ). **(C)** Appearance of head milled rice.

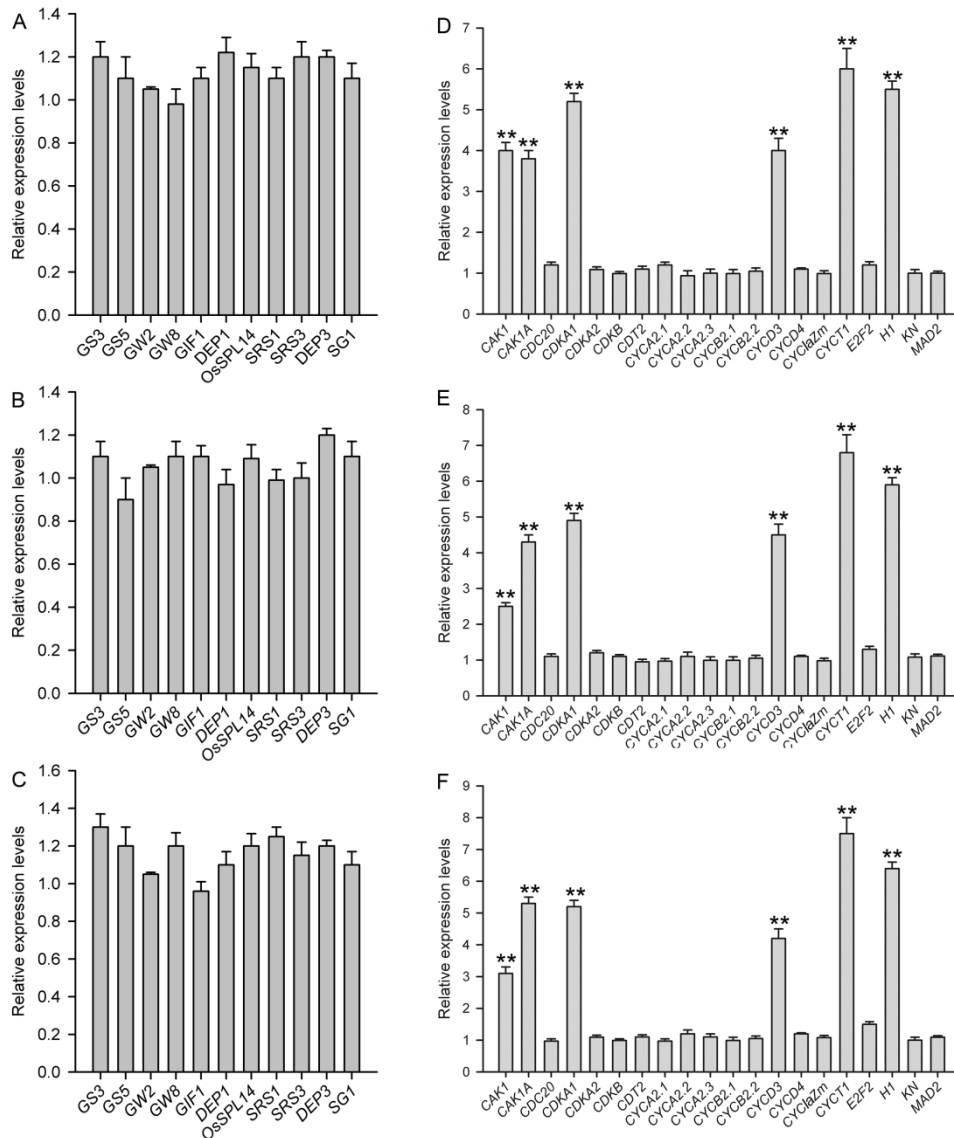

**Supplemental Figure S7.** Comparisons of transcripts of genes determining for grain size and genes involved in cell cycle between wild-type (WT) and *pPPP2::AtSUC2* rice plants.

The analysis of relative expression ratio was determined by qRT-PCR using young panicles during the inflorescence development. The data were expressed relative to the level of transcripts in WT. All data are given as mean  $\pm$  SD ( $n = 5$ ). Asterisks indicate significant difference from the wild-type (\*  $P < 0.05$ , \*\* $P < 0.01$ ). A Student's *t*-test was used to generate the *P* values. **(A, D)** Young panicle (<0.2 cm in length). **(B, E)** Panicle of length 3 cm. **(C, F)** Panicle of length 6 cm.



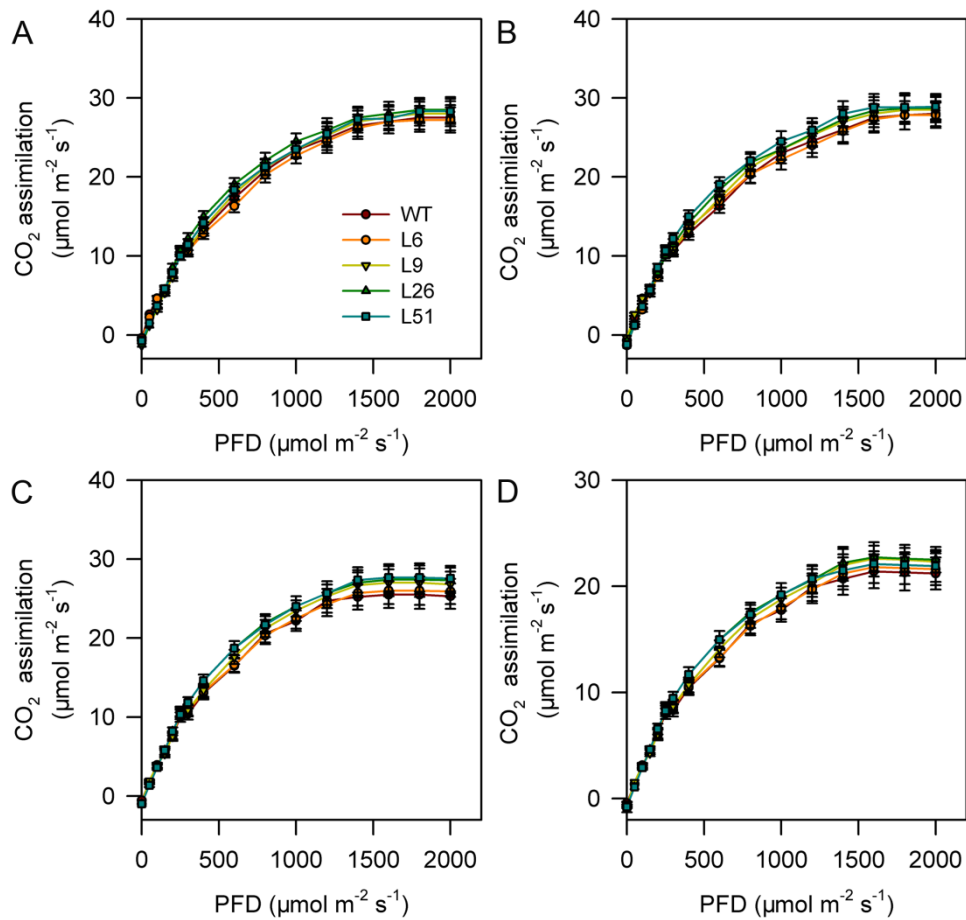

**Supplemental Figure S8.** CO<sub>2</sub> assimilation in leaves of wild-type (WT) and *pPPP2::AtSUC2* rice plants.

All data are given as mean  $\pm$  SD (n =10). Significant differences from the WT are based on Student's *t*-test and indicated by \* if  $P < 0.05$  or \*\* if  $P < 0.01$ . **(A)** Tillering stage. **(B)** 0 day after fertilization. **(C)** The 10<sup>th</sup> day after fertilization. **(D)** The 20<sup>th</sup> day after fertilization.

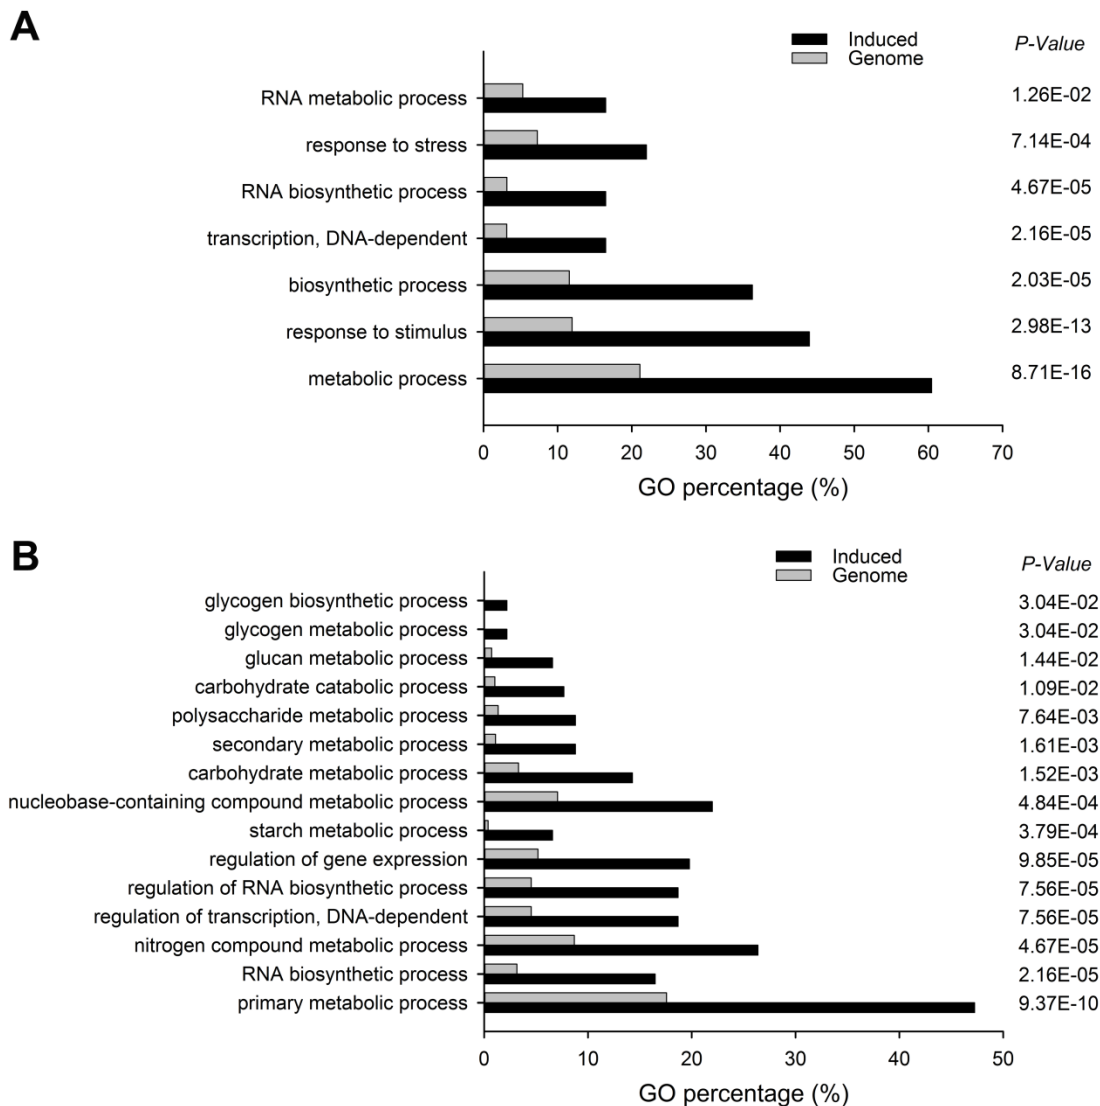

**Supplemental Figure S9.** Global analysis of gene expression profiles in flag leaves of *pPP2::AtSUC2* rice plants (line 51).

(A) Expression profiles of genes up-regulated in flag leaves of Line 51 based on the Gene Ontology (GO) annotation (biological process) in TAIR. (B) Analysis of genes induced in flag leaves of line 51 by specific GO terms. The flag leaves on the 10<sup>th</sup> day after fertilization were used for the microarray analysis. *P*-values in A and B were calculated by Fisher's test to compare the percentage distribution of GO annotation from genes induced by overexpressed *AtSUC2* and the whole genome.

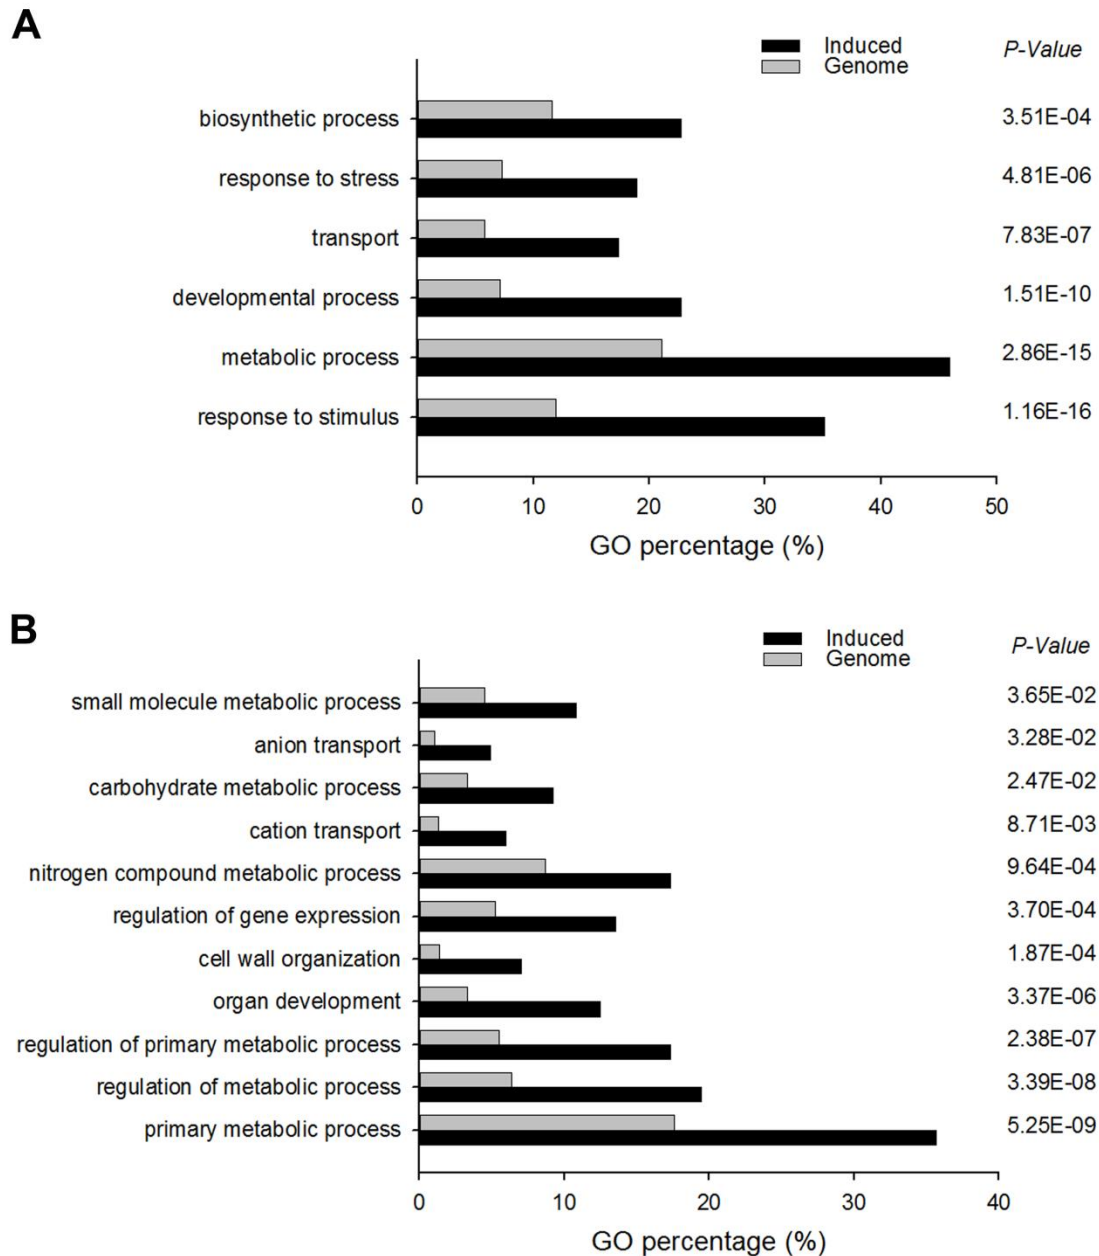

**Supplemental Figure S10.** Global analysis of gene expression profiles in developing seeds of *pPP2::AtSUC2* rice plants (line 51).

(A) Expression profiles of genes up-regulated in developing seeds of Line 51 based on the Gene Ontology (GO) annotation (biological process) in TAIR. (B) Analysis of genes induced in developing seeds of line 51 by specific GO terms. The developing seeds on the 10<sup>th</sup> day after fertilization were used for the microarray analysis. P-values in A and B were calculated by Fisher's test to compare the percentage distribution of GO annotation from genes induced by overexpressed *AtSUC2* and the whole genome.

**Supplemental Table S1.** Genes found to be significantly up-regulated ( $\geq 1.5$ , A) or down-regulated ( $\leq 1.5$ , B) in flag leaves of *pPP2::AtSUC2* rice plants (line 51) on the 10<sup>th</sup> day after fertilization in a microarray analysis. Data were mean from three biological replicates

| <b>A (Up-regulated 117 genes)</b> |                    |                |                                                       |
|-----------------------------------|--------------------|----------------|-------------------------------------------------------|
| <b>Locus</b>                      | <b>Fold change</b> | <b>P-Value</b> | <b>Description</b>                                    |
| Os01g0108500                      | 115.97             | 3.54E-07       | Conserved hypothetical protein                        |
| Os01g0288700                      | 4.61               | 9.05E-03       | Hypothetical gene                                     |
| Os01g0384800                      | 2.35               | 3.93E-02       | Conserved hypothetical protein                        |
| Os01g0385000                      | 8.09               | 3.31E-02       | Malic acid transport protein                          |
| Os01g0385400                      | 6.48               | 3.73E-02       | malic acid transport protein                          |
| Os01g0567200                      | 161.56             | 5.57E-05       | Conserved hypothetical protein                        |
| Os01g0602200                      | 2.06               | 1.84E-04       | Cytochrome P450                                       |
| Os01g0606900                      | 2.06               | 4.28E-04       | Heat shock protein DnaJ                               |
| Os01g0633100                      | 1.86               | 5.05E-05       | ADP glucose pyrophosphorylase large subunit 2 (AGPL2) |
| Os01g0687400                      | 2.28               | 1.20E-03       | Similar to chitinase                                  |
| Os01g0704100                      | 1.64               | 3.80E-03       | Nitrate transporter 2.3(OsNRT2.3)                     |
| Os01g0723700                      | 2.21               | 7.34E-04       | Transcriptional factor B3 family protein              |
| Os01g0845900                      | 255.04             | 2.45E-04       | Unknown                                               |
| Os01g0866400                      | 1.60               | 2.49E-03       | Cytosolic fructose-1,6-bisphosphatase 1 (cyFBP1)      |
| Os02g0117700                      | 1.96               | 2.42E-04       | UDP-glucose pyrophosphorylase 2 (UGP2)                |
| Os02g0132300                      | 2.05               | 1.92E-02       | Similar to erythrocyte membrane protein PFEMP3        |
| Os02g0185400                      | 17.20              | 7.40E-03       | Cytochrome P450 family protein                        |
| Os02g0207900                      | 3.80               | 4.39E-03       | Alpha/beta hydrolase                                  |
| Os02g0211100                      | 2.70               | 7.24E-04       | Hypothetical protein                                  |
| Os02g0252400                      | 8.42               | 7.51E-03       | Rice prolamin box binding factor                      |
| Os02g0441000                      | 2.97               | 2.04E-02       | Conserved hypothetical protein                        |
| Os02g0579600                      | 2.93               | 2.02E-02       | Transcription factor MADS27                           |
| Os02g0620500                      | 1.67               | 2.80E-04       | Ammonium transporter 1.2 (OsAMT1.2)                   |

|              |          |          |                                                                           |
|--------------|----------|----------|---------------------------------------------------------------------------|
| Os02g0629300 | 3.09     | 9.41E-05 | Conserved hypothetical protein                                            |
| Os02g0631200 | 1.57     | 1.85E-03 | Photosystem II oxygen evolving complex protein PsbQ                       |
| Os02g0805300 | 1.57     | 2.81E-02 | Auxin-responsive protein IAA12                                            |
| Os02g0814600 | 2.48     | 5.00E-03 | EF-HAND 1 domain containing protein                                       |
| Os02g0830200 | 2.97     | 5.80E-03 | Oligopeptidase A (OsRR3)                                                  |
| Os03g0106500 | 5.02     | 2.50E-04 | Expansin-B1 (Beta-expansin-1, OsEXPB1)                                    |
| Os03g0106900 | 15.39    | 4.33E-07 | Beta-expansin precursor (Beta-expansin 1)                                 |
| Os03g0115800 | 11943.03 | 1.76E-07 | Conserved hypothetical protein                                            |
| Os03g0170900 | 3.32     | 9.43E-03 | Sucrose transporter 1 (OsSUT1)                                            |
| Os03g0412400 | 5.31     | 1.12E-03 | Conserved hypothetical protein                                            |
| Os03g0429900 | 147.51   | 7.79E-07 | Nucleic acid-binding, OB-fold domain containing protein                   |
| Os03g0640000 | 2.13     | 1.00E-02 | Patatin family protein                                                    |
| Os03g0847700 | 3.32     | 1.39E-04 | Conserved hypothetical protein                                            |
| Os04g0223500 | 2.66     | 1.93E-03 | Dimethylaniline monooxygenase                                             |
| Os04g0510000 | 755.71   | 4.80E-07 | Conserved hypothetical protein                                            |
| Os04g0526300 | 2.19     | 1.05E-02 | Sulfotransferase family protein                                           |
| Os04g0565200 | 2.47     | 3.69E-02 | Similar to Cis-zeatin O-glucosyltransferase 1                             |
| Os04g0599300 | 3.42     | 4.78E-02 | Basic helix-loop-helix dimerisation region bHLH domain containing protein |
| Os04g0604000 | 2.43     | 3.65E-02 | Similar to Actin filament bundling protein P-115-ABP                      |
| Os04g0640300 | 2.26     | 1.26E-02 | Conserved hypothetical protein                                            |
| Os04g0677300 | 5.62     | 3.59E-03 | Harpin-induced 1 domain containing protein                                |
| Os05g0100100 | 3.68     | 4.86E-04 | Conserved hypothetical protein                                            |
| Os05g0108900 | 2.26     | 1.60E-02 | Cytochrome b5                                                             |
| Os05g0112900 | 2.27     | 9.28E-04 | Pentatricopeptide repeat domain containing protein                        |
| Os05g0124700 | 65.42    | 4.49E-04 | Deoxynucleoside kinase family protein                                     |
| Os05g0164400 | 5.24     | 4.41E-03 | Fructose-2, 6-bisphosphatase                                              |
| Os05g0196200 | 2.27     | 1.99E-02 | Pollen-specific protein                                                   |
| Os05g0211800 | 2.79     | 4.57E-02 | Hypothetical conserved gene                                               |
| Os05g0270500 | 85.90    | 4.36E-05 | Similar to predicted protein                                              |

|              |        |          |                                                                                                   |
|--------------|--------|----------|---------------------------------------------------------------------------------------------------|
| Os05g0296200 | 2.60   | 4.04E-03 | Conserved hypothetical protein                                                                    |
| Os05g0296800 | 10.47  | 1.66E-03 | Small heat shock protein                                                                          |
| Os05g0417400 | 9.31   | 6.16E-05 | Universal stress protein family protein                                                           |
| Os05g0515500 | 5.72   | 6.64E-04 | Auxin response factor 14                                                                          |
| Os05g0571200 | 4.20   | 1.29E-02 | Similar to WRKY transcription factor 19                                                           |
| Os05g0588800 | 2.12   | 9.36E-04 | Similar to <i>Yarrowia lipolytica</i> chromosome D of strain CLIB99 of <i>Yarrowia lipolytica</i> |
| Os06g0133000 | 3.06   | 1.78E-04 | Granule-bound starch synthase I, chloroplast precursor                                            |
| Os06g0200800 | 4.22   | 9.33E-03 | Conserved hypothetical protein                                                                    |
| Os06g0261300 | 4.38   | 3.36E-04 | Conserved hypothetical protein                                                                    |
| Os06g0265100 | 465.62 | 1.10E-07 | Asparagine synthetase                                                                             |
| Os06g0276300 | 2.02   | 1.52E-02 | NB-ARC domain containing protein                                                                  |
| Os06g0517000 | 2.29   | 2.02E-04 | Hypothetical gene                                                                                 |
| Os06g0521400 | 2.07   | 4.54E-03 | Haem peroxidase                                                                                   |
| Os06g0566600 | 3.07   | 8.94E-05 | Hypothetical protein                                                                              |
| Os06g0595900 | 2.28   | 2.95E-03 | Transcription elongation factor S-II                                                              |
| Os06g0633800 | 1.54   | 2.33E-02 | Amino acid transporter-like 5 (OsATL5)                                                            |
| Os06g0635500 | 2.91   | 4.70E-03 | Hypothetical conserved gene                                                                       |
| Os06g0675600 | 3.14   | 3.94E-02 | Similar to GRAB2 protein                                                                          |
| Os06g0695100 | 3.05   | 3.35E-04 | Conserved hypothetical protein                                                                    |
| Os06g0726400 | 1.53   | 5.56E-03 | Branching enzyme I (BEI)                                                                          |
| Os07g0122000 | 2.93   | 3.16E-02 | Protein of unknown function DUF1719                                                               |
| Os07g0146700 | 3.55   | 1.44E-03 | Conserved hypothetical protein                                                                    |
| Os07g0489200 | 5.34   | 1.57E-03 | UDP-glucuronosyl/UDP-glucosyltransferase family protein                                           |
| Os07g0490100 | 16.85  | 4.55E-05 | UDP-glucuronosyl/UDP-glucosyltransferase family protein                                           |
| Os07g0539100 | 6.93   | 7.70E-04 | Glycoside hydrolase, family 17 protein                                                            |
| Os07g0543300 | 2.20   | 7.41E-03 | Beta-amylase                                                                                      |
| Os07g0563100 | 3.12   | 1.49E-03 | Hypothetical protein                                                                              |
| Os07g0580700 | 7.40   | 1.63E-03 | Integrin alpha chain                                                                              |

|              |        |          |                                                              |
|--------------|--------|----------|--------------------------------------------------------------|
| Os07g0603700 | 3.23   | 4.19E-02 | Similar to cytochrome P-450                                  |
| Os07g0617200 | 3.16   | 3.53E-04 | Ethylene response factor                                     |
| Os07g0622500 | 2.43   | 4.03E-02 | Similar to mutator-like transposase                          |
| Os07g0641400 | 3.07   | 2.51E-03 | Calcium/calmodulin-dependent serine/threonine-protein kinase |
| Os08g0124700 | 2.28   | 1.05E-02 | Resistance protein candidate                                 |
| Os08g0246800 | 4.30   | 5.89E-04 | Conserved hypothetical protein                               |
| Os08g0315200 | 3.21   | 5.38E-03 | Retrotransposon gag protein family protein                   |
| Os08g0540400 | 3.89   | 3.71E-02 | Similar to calcium-dependent protein kinase                  |
| Os09g0122500 | 6.94   | 2.83E-02 | Unknown                                                      |
| Os09g0452400 | 3.33   | 1.87E-02 | Peptidase A1 domain containing protein                       |
| Os10g0107100 | 59.88  | 1.35E-05 | Nucleic acid-binding, OB-fold domain containing protein      |
| Os10g0113000 | 2.02   | 6.31E-03 | Chalcone reductase                                           |
| Os10g0114300 | 11.74  | 5.67E-04 | Similar to NADPH-dependent codeinone reductase               |
| Os10g0200000 | 2.21   | 9.17E-04 | Protein kinase                                               |
| Os10g0318200 | 3.46   | 1.02E-03 | Hypothetical protein                                         |
| Os10g0340100 | 35.67  | 6.31E-04 | Hypothetical conserved gene                                  |
| Os10g0348900 | 2.12   | 7.96E-03 | Conserved hypothetical protein                               |
| Os10g0419400 | 2.66   | 1.37E-03 | Similar to SIPL                                              |
| Os10g0463000 | 3.28   | 5.36E-04 | Conserved hypothetical protein                               |
| Os10g0522500 | 2.39   | 4.02E-03 | Similar to predicted protein                                 |
| Os10g0525400 | 8.81   | 2.40E-02 | Glutathione S-transferase                                    |
| Os11g0102200 | 3.72   | 4.38E-03 | Similar to non-phototrophic hypocotyl 1a                     |
| Os11g0173500 | 2.23   | 3.06E-06 | Hypothetical conserved gene                                  |
| Os11g0224300 | 181.04 | 3.07E-06 | Integrase                                                    |
| Os11g0245100 | 6.87   | 1.48E-02 | Similar to glutathione S-transferase 2                       |
| Os11g0282700 | 13.26  | 2.91E-04 | Homeodomain-like containing protein                          |
| Os11g0491600 | 12.63  | 1.69E-04 | WRKY transcription factor                                    |
| Os12g0101800 | 4.11   | 9.43E-05 | Non-phototrophic hypocotyl 1a                                |
| Os12g0156100 | 5.74   | 8.44E-03 | Similar to NAC-domain containing protein 90 (ANAC090)        |

|                                    |       |          |                                                                   |
|------------------------------------|-------|----------|-------------------------------------------------------------------|
| Os12g0169300                       | 11.82 | 2.57E-04 | Conserved hypothetical protein                                    |
| Os12g0248600                       | 3.65  | 4.75E-02 | Hypothetical protein                                              |
| Os12g0543800                       | 12.04 | 7.82E-05 | Conserved hypothetical protein                                    |
| Os12g0547600                       | 3.18  | 6.60E-03 | Calmodulin binding protein-like family protein                    |
| Os12g0555000                       | 5.13  | 5.28E-03 | Lipase (root specific rice PR10, RSOsPR10)                        |
| Os12g0555300                       | 2.83  | 5.64E-03 | Pathogenesis-related protein                                      |
| Os12g0555500                       | 2.99  | 4.88E-04 | Probenazole-inducible protein PBZ1                                |
| Os12g0571000                       | 2.27  | 3.52E-03 | Metallothionein-like protein type 1                               |
| <b>B (Down-regulated 94 genes)</b> |       |          |                                                                   |
| Os01g0212100                       | 0.310 | 7.69E-05 | Similar to predicted protein                                      |
| Os01g0246400                       | 0.068 | 1.53E-02 | Similar to low molecular mass early light-inducible protein HV90  |
| Os01g0595900                       | 0.462 | 1.94E-04 | Cyclin-like F-box domain containing protein                       |
| Os01g0659900                       | 0.428 | 3.71E-02 | Cyclin-like F-box domain containing protein                       |
| Os01g0720400                       | 0.495 | 3.11E-02 | HAD-superfamily subfamily IB hydrolase                            |
| Os01g0830500                       | 0.259 | 2.59E-03 | 2OG-Fe(II) oxygenase domain containing protein                    |
| Os01g0909500                       | 0.436 | 1.73E-04 | Similar to cDNA clone: J013116D08                                 |
| Os01g0953500                       | 0.446 | 1.47E-02 | C2 calcium-dependent membrane targeting domain containing protein |
| Os02g0103500                       | 0.481 | 4.75E-02 | Similar to nodulin protein                                        |
| Os02g0139500                       | 0.093 | 4.04E-03 | Similar to cycloartenol synthase                                  |
| Os02g0145200                       | 0.325 | 1.05E-03 | Conserved hypothetical protein                                    |
| Os02g0172800                       | 0.210 | 2.13E-03 | Similar to Zinc-binding protein                                   |
| Os02g0202200                       | 0.444 | 1.67E-02 | SPX, N-terminal domain containing protein                         |
| Os02g0492900                       | 0.083 | 4.34E-02 | Similar to ankyrin-like protein                                   |
| Os02g0628900                       | 0.223 | 5.63E-03 | Hypothetical conserved gene                                       |
| Os02g0635600                       | 0.385 | 1.42E-05 | Tyrosine protein kinase domain containing protein                 |
| Os02g0709000                       | 0.278 | 2.96E-03 | Exonuclease domain containing protein                             |
| Os02g0807300                       | 0.481 | 5.84E-03 | Conserved hypothetical protein                                    |
| Os02g0828200                       | 0.426 | 3.12E-03 | TPR-like domain containing protein                                |



|              |       |          |                                                           |
|--------------|-------|----------|-----------------------------------------------------------|
| Os03g0103200 | 0.149 | 6.38E-03 | Similar to physical impedance induced protein             |
| Os03g0183000 | 0.458 | 1.36E-02 | Similar to AP2 domain containing protein RAP2.6           |
| Os03g0233000 | 0.191 | 2.62E-03 | Protein of unknown function DUF607 family protein         |
| Os03g0267500 | 0.451 | 3.33E-04 | Fructose-1,6-bisphosphatase                               |
| Os03g0579800 | 0.431 | 4.31E-04 | Hypothetical protein                                      |
| Os03g0679800 | 0.299 | 1.38E-02 | Similar to TPR domain containing protein                  |
| Os04g0115200 | 0.469 | 1.53E-02 | Conserved hypothetical protein                            |
| Os04g0172100 | 0.471 | 2.67E-03 | Hypothetical protein                                      |
| Os04g0266400 | 0.491 | 6.26E-05 | Similar to OSIGBa0139I12.2 protein                        |
| Os04g0357200 | 0.103 | 2.69E-02 | Non-protein coding transcript                             |
| Os04g0462400 | 0.287 | 1.20E-02 | Similar to lysine/histidine transporter                   |
| Os04g0472300 | 0.402 | 3.57E-02 | Hypothetical conserved gene                               |
| Os04g0493400 | 0.315 | 4.85E-02 | Similar to Chitinase                                      |
| Os04g0494100 | 0.304 | 4.26E-02 | Similar to Chitinase                                      |
| Os04g0528400 | 0.327 | 1.32E-04 | ABC transporter                                           |
| Os04g0555300 | 0.417 | 7.72E-03 | Major facilitator superfamily protein                     |
| Os04g0568600 | 0.424 | 3.67E-02 | Similar to 6-phospho-3-hexuloisomerase                    |
| Os05g0131000 | 0.456 | 3.74E-02 | Protein of unknown function DUF247                        |
| Os05g0151200 | 0.320 | 4.30E-02 | TspO/MBR-related protein family protein                   |
| Os05g0155000 | 0.466 | 9.71E-03 | Similar to protein MFP-b                                  |
| Os05g0197900 | 0.413 | 3.83E-02 | Protein of unknown function DUF247                        |
| Os05g0256100 | 0.309 | 1.51E-03 | Serine/threonine protein kinase                           |
| Os05g0360400 | 0.347 | 4.75E-02 | Zinc finger, RING/FYVE/PHD-type domain containing protein |
| Os05g0382400 | 0.482 | 3.92E-02 | Conserved hypothetical protein                            |
| Os05g0418800 | 0.414 | 6.78E-03 | Similar to CUC2                                           |
| Os05g0563300 | 0.499 | 2.09E-03 | Conserved hypothetical protein                            |
| Os05g0571700 | 0.423 | 1.50E-05 | Cyclin-like F-box domain containing protein               |
| Os06g0112100 | 0.386 | 2.64E-03 | Nucleoside phosphorylase                                  |
| Os06g0141200 | 0.262 | 1.27E-02 | RNA-binding protein                                       |

|              |       |          |                                                              |
|--------------|-------|----------|--------------------------------------------------------------|
| Os06g0141300 | 0.336 | 4.93E-04 | Unknown                                                      |
| Os06g0147000 | 0.498 | 4.26E-02 | Conserved hypothetical protein                               |
| Os06g0226500 | 0.385 | 1.87E-02 | Brassinosteroid upregulated1                                 |
| Os06g0304600 | 0.487 | 4.12E-03 | Aspartic proteinase nepenthesin-2                            |
| Os06g0317200 | 0.424 | 2.11E-02 | Glycine-rich protein                                         |
| Os06g0358800 | 0.276 | 2.88E-02 | Ribonuclease III domain containing protein                   |
| Os06g0360300 | 0.317 | 7.04E-03 | NAD(P)-binding domain containing protein                     |
| Os06g0363900 | 0.172 | 4.40E-04 | Similar to Stable protein 1                                  |
| Os06g0367500 | 0.246 | 3.68E-02 | B-cell receptor-associated 31-like domain containing protein |
| Os06g0488200 | 0.232 | 4.81E-05 | Myosin heavy chain                                           |
| Os06g0579400 | 0.410 | 3.36E-02 | Non-protein coding transcript                                |
| Os06g0713400 | 0.462 | 1.15E-03 | Cyclin-like F-box domain containing protein                  |
| Os07g0100600 | 0.339 | 1.76E-03 | Peptide transporter 1 (OsPTR1)                               |
| Os07g0100800 | 0.342 | 9.58E-04 | Similar to amino acid permease                               |
| Os07g0106700 | 0.300 | 2.22E-02 | Similar to aminotransferase-like protein                     |
| Os07g0151700 | 0.341 | 2.83E-03 | Conserved hypothetical protein                               |
| Os07g0232800 | 0.492 | 1.19E-02 | Similar to Zinc transporter protein ZIP1                     |
| Os07g0301000 | 0.210 | 2.13E-03 | Similar to stable protein 1                                  |
| Os07g0435900 | 0.016 | 4.20E-06 | SET domain containing protein                                |
| Os07g0456400 | 0.149 | 3.40E-05 | LUC7 related family protein                                  |
| Os07g0525100 | 0.349 | 1.34E-03 | Protein of unknown function DUF6 domain containing protein   |
| Os07g0527000 | 0.490 | 1.18E-03 | Similar to nodulin-like protein                              |
| Os08g0100300 | 0.020 | 9.81E-04 | Non-protein coding transcript                                |
| Os08g0148600 | 0.441 | 1.93E-03 | Similar to glycosyltransferase QUASIMODO1                    |
| Os08g0189600 | 0.374 | 1.82E-02 | <i>Oryza sativa</i> germin-like protein 8-7                  |
| Os08g0234400 | 0.176 | 1.84E-03 | Hypothetical gene                                            |
| Os08g0327700 | 0.238 | 3.75E-02 | Late embryogenesis abundant (LEA) group 1 family protein     |
| Os08g0419100 | 0.489 | 4.30E-03 | Conserved hypothetical protein                               |
| Os08g0507400 | 0.449 | 1.81E-02 | Cytochrome P450 family protein                               |

|              |       |          |                                                   |
|--------------|-------|----------|---------------------------------------------------|
| Os09g0339600 | 0.238 | 1.43E-03 | Hypothetical conserved gene                       |
| Os09g0415300 | 0.143 | 8.14E-05 | Hypothetical conserved gene                       |
| Os09g0438100 | 0.363 | 2.31E-02 | Conserved hypothetical protein                    |
| Os09g0544000 | 0.362 | 2.36E-02 | Transferase family protein                        |
| Os10g0159300 | 0.214 | 4.82E-03 | Conserved hypothetical protein                    |
| Os10g0170600 | 0.319 | 2.29E-03 | HAT family dimerization domain containing protein |
| Os10g0368100 | 0.258 | 7.51E-03 | Similar to glutathione S-transferase GSTU35       |
| Os10g0427300 | 0.398 | 2.08E-02 | Conserved hypothetical protein                    |
| Os10g0513200 | 0.470 | 3.11E-02 | Similar to aquaporin NIP3-1                       |
| Os10g0529600 | 0.406 | 3.01E-03 | Conserved hypothetical protein                    |
| Os10g0530400 | 0.459 | 2.31E-02 | Unknown                                           |
| Os11g0236100 | 0.364 | 1.48E-02 | Similar to Sucrose-phosphate synthase             |
| Os11g0278300 | 0.499 | 3.96E-02 | Hypothetical conserved gene                       |
| Os11g0428500 | 0.401 | 1.27E-04 | Conserved hypothetical protein                    |
| Os12g0129700 | 0.430 | 4.71E-03 | Cyclin-like F-box domain containing protein       |
| Os12g0406000 | 0.140 | 1.69E-04 | Hypothetical conserved gene                       |
| Os12g0553600 | 0.403 | 9.03E-05 | Hypothetical conserved gene                       |

**Supplemental Table S2.** Genes found to be significantly up-regulated ( $\geq 1.5$ , A) or down-regulated ( $\leq 1.5$ , B) in developing seeds of *pPP2::AtSUC2* rice plants (line 51) on the 10<sup>th</sup> day after fertilization in a microarray analysis. Data were mean from three biological replicates

| <b>A (Up-regulated 204 genes)</b> |                    |                |                                                                   |
|-----------------------------------|--------------------|----------------|-------------------------------------------------------------------|
| <b>Locus</b>                      | <b>Fold change</b> | <b>P-Value</b> | <b>Description</b>                                                |
| Os01g0108500                      | 75.03              | 2.01E-06       | Conserved hypothetical protein                                    |
| Os01g0139000                      | 2.33               | 2.42E-02       | Reticulon family protein                                          |
| Os01g0168800                      | 2.12               | 3.13E-02       | Alpha/beta hydrolase fold-1 domain containing protein             |
| Os01g0171000                      | 2.13               | 1.30E-02       | Similar to leucine-rich repeat receptor-like kinase               |
| Os01g0214600                      | 2.11               | 2.21E-02       | Lipase, GDSL domain containing protein                            |
| Os01g0253500                      | 2.15               | 3.26E-02       | Conserved hypothetical protein                                    |
| Os01g0266400                      | 2.28               | 5.65E-03       | Conserved hypothetical protein                                    |
| Os01g0541800                      | 3.20               | 1.36E-02       | MtN3 and saliva related transmembrane protein family protein      |
| Os01g0566500                      | 5.43               | 3.39E-02       | Similar to dioxygenase RAMOSUS1                                   |
| Os01g0567200                      | 78.12              | 1.05E-05       | Conserved hypothetical protein                                    |
| Os01g0611000                      | 2.67               | 1.10E-02       | Hypothetical conserved gene                                       |
| Os01g0652300                      | 2.89               | 2.97E-02       | Lipase-like protein                                               |
| Os01g0683700                      | 2.43               | 3.99E-03       | Protein of unknown function DUF599 family protein                 |
| Os01g0723700                      | 2.13               | 3.87E-02       | Transcriptional factor B3 family protein                          |
| Os01g0750300                      | 2.17               | 2.35E-02       | Unknown                                                           |
| Os01g0805600                      | 4.54               | 1.51E-04       | Cyclins in embryo and endosperm development, CycB1;1              |
| Os01g0806400                      | 2.37               | 4.32E-02       | Protein of unknown function DUF617                                |
| Os01g0813800                      | 2.88               | 2.29E-02       | Glycoside hydrolase, family 1 protein                             |
| Os01g0850700                      | 11.04              | 7.32E-03       | Similar to laccase-7                                              |
| Os01g0889900                      | 2.92               | 1.34E-02       | Serine/threonine protein kinase-related domain containing protein |
| Os01g0927000                      | 3.39               | 6.90E-03       | Similar to SET domain-containing protein SET118                   |
| Os01g0930400                      | 4.87               | 2.13E-02       | Potassium transporter 5                                           |
| Os01g0946500                      | 3.87               | 2.93E-02       | Glucan endo-1,3-beta-glucosidase GV                               |
| Os02g0123800                      | 4.39               | 3.80E-02       | Unknown                                                           |

|              |        |          |                                                         |
|--------------|--------|----------|---------------------------------------------------------|
| Os02g0213100 | 2.91   | 8.08E-03 | Conserved hypothetical protein                          |
| Os02g0216200 | 60.31  | 1.62E-05 | Hypothetical protein                                    |
| Os02g0232900 | 4.66   | 2.07E-02 | Aquaporin NIP1-1                                        |
| Os02g0234700 | 2.03   | 1.74E-02 | Conserved hypothetical protein                          |
| Os02g0246900 | 2.32   | 3.32E-02 | Conserved hypothetical protein                          |
| Os02g0252400 | 11.15  | 6.89E-04 | Rice prolamin box binding factor                        |
| Os02g0253800 | 57.77  | 1.24E-05 | Hypothetical protein                                    |
| Os02g0278700 | 4.31   | 2.29E-03 | Similar to kaurene synthase A                           |
| Os02g0511400 | 4.38   | 7.06E-04 | Glucose/ribitol dehydrogenase family protein            |
| Os02g0613900 | 3.80   | 5.41E-03 | Similar to Adenine phosphoribosyltransferase 2          |
| Os02g0648300 | 2.61   | 7.05E-03 | DNA-binding domain containing protein                   |
| Os02g0671800 | 4.36   | 3.61E-02 | Hypothetical protein                                    |
| Os02g0695200 | 11.46  | 4.71E-05 | Similar to P-type R2R3 Myb protein                      |
| Os02g0777400 | 2.29   | 2.38E-02 | Similar to ERECTA-like kinase 1                         |
| Os03g0103300 | 3.26   | 3.03E-03 | QLTG-3-1 protein                                        |
| Os03g0115700 | 11.68  | 2.15E-02 | Short-chain dehydrogenase/reductase SDR family protein  |
| Os03g0115800 | 296.57 | 3.30E-04 | Conserved hypothetical protein                          |
| Os03g0128000 | 2.88   | 9.97E-03 | Hypothetical protein                                    |
| Os03g0141100 | 25.43  | 9.32E-03 | Conserved hypothetical protein                          |
| Os03g0168300 | 4.64   | 6.22E-03 | Conserved hypothetical protein                          |
| Os03g0170600 | 2.45   | 1.89E-02 | Similar to homeobox-leucine zipper protein HOX21        |
| Os03g0270900 | 2.57   | 4.72E-02 | Hypothetical conserved gene                             |
| Os03g0287400 | 3.43   | 9.51E-03 | Similar to LOB domain protein 4                         |
| Os03g0303100 | 3.46   | 3.70E-02 | Protein of unknown function DUF1645 family protein      |
| Os03g0338700 | 2.90   | 2.81E-02 | Hypothetical conserved gene                             |
| Os03g0370400 | 5.77   | 2.42E-02 | Protein of unknown function DUF679 family protein       |
| Os03g0429900 | 444.37 | 2.60E-07 | Nucleic acid-binding, OB-fold domain containing protein |
| Os03g0582000 | 2.24   | 4.94E-02 | Glutamate formiminotransferase                          |
| Os03g0629800 | 547.00 | 2.05E-07 | Conserved hypothetical protein                          |

|              |        |          |                                                              |
|--------------|--------|----------|--------------------------------------------------------------|
| Os03g0637900 | 2.01   | 8.59E-03 | Conserved hypothetical protein                               |
| Os03g0646100 | 2.42   | 8.49E-03 | Similar to plastid division protein ftsZ1 precursor          |
| Os03g0663800 | 1.60   | 4.27E-03 | Globulin1                                                    |
| Os03g0673000 | 2.28   | 1.50E-02 | Similar to knotted1-type homeobox protein OSH10              |
| Os03g0773700 | 2.74   | 4.83E-02 | Similar to receptor-like protein kinase 2                    |
| Os03g0793800 | 6.09   | 2.19E-02 | Lipid transfer protein                                       |
| Os03g0861400 | 2.67   | 2.60E-02 | Hypothetical conserved gene                                  |
| Os04g0175600 | 2.56   | 7.64E-03 | O-methyltransferase                                          |
| Os04g0175900 | 3.28   | 1.14E-03 | Winged helix repressor DNA-binding domain containing protein |
| Os04g0208500 | 5.17   | 1.58E-03 | Cyclin-like F-box domain containing protein                  |
| Os04g0209300 | 2.61   | 2.96E-02 | Glutathione-conjugate transporter                            |
| Os04g0219800 | 2.68   | 1.49E-02 | Hypothetical protein                                         |
| Os04g0223500 | 10.74  | 3.50E-04 | Dimethylaniline monooxygenase                                |
| Os04g0223600 | 200.72 | 4.10E-06 | Hypothetical gene                                            |
| Os04g0249600 | 4.13   | 3.97E-04 | senescence-associated protein DIN1                           |
| Os04g0295100 | 2.14   | 1.58E-03 | Similar to predicted protein                                 |
| Os04g0397900 | 111.49 | 1.50E-05 | Conserved hypothetical protein                               |
| Os04g0401000 | 4.63   | 1.17E-03 | Heavy metal transport                                        |
| Os04g0412300 | 2.47   | 3.70E-03 | Similar to H0717B12.10 protein                               |
| Os04g0422300 | 365.77 | 2.39E-06 | Protein of unknown function DUF6                             |
| Os04g0422700 | 3.88   | 1.64E-02 | Conserved hypothetical protein                               |
| Os04g0436900 | 2.15   | 8.04E-03 | Hypothetical protein                                         |
| Os04g0442300 | 2.71   | 3.93E-02 | A-type response regulator 1                                  |
| Os04g0447800 | 6.15   | 3.03E-03 | Glutamate decarboxylase                                      |
| Os04g0478000 | 2.12   | 1.91E-04 | Conserved hypothetical protein                               |
| Os04g0482300 | 3.95   | 2.80E-03 | BTB domain containing protein                                |
| Os04g0496300 | 10.11  | 2.13E-02 | Conserved hypothetical protein                               |
| Os04g0510000 | 251.14 | 2.37E-04 | Conserved hypothetical protein                               |
| Os04g0526300 | 6.38   | 4.17E-03 | Sulfotransferase family protein                              |

|              |         |          |                                                    |
|--------------|---------|----------|----------------------------------------------------|
| Os04g0581100 | 5.86    | 4.26E-02 | 2OG-Fe(II) oxygenase domain containing protein     |
| Os04g0585900 | 3.57    | 2.48E-02 | Protein of unknown function DUF581 family protein  |
| Os04g0587500 | 2.53    | 4.41E-02 | HAT dimerisation domain containing protein         |
| Os04g0604000 | 2.34    | 1.73E-02 | Actin filament bundling protein                    |
| Os04g0621800 | 2.10    | 8.28E-03 | Conserved hypothetical protein                     |
| Os04g0677300 | 3.42    | 2.85E-03 | Harpin-induced 1 domain containing protein         |
| Os04g0678700 | 2.02    | 2.14E-04 | NADPH-protochlorophyllide oxidoreductase           |
| Os04g0689400 | 2.94    | 7.79E-03 | Protein kinase                                     |
| Os05g0100100 | 6.01    | 1.14E-03 | Conserved hypothetical protein                     |
| Os05g0112900 | 2.00    | 2.54E-02 | Pentatricopeptide repeat domain containing protein |
| Os05g0119700 | 2.11    | 3.20E-02 | Hypothetical protein                               |
| Os05g0124700 | 39.15   | 2.40E-05 | Deoxynucleoside kinase family protein              |
| Os05g0143000 | 6.79    | 3.06E-03 | Conserved hypothetical protein                     |
| Os05g0164400 | 3.48    | 2.04E-03 | Harpin-induced 1 domain containing protein         |
| Os05g0231700 | 2.21    | 1.26E-03 | Tonoplast intrinsic protein (OsTIP4;1)             |
| Os05g0263300 | 7.40    | 4.93E-03 | Unknown                                            |
| Os05g0270500 | 1300.97 | 7.97E-07 | Predicted protein                                  |
| Os05g0296200 | 40.03   | 2.39E-06 | Conserved hypothetical protein                     |
| Os05g0296800 | 5.75    | 1.19E-02 | Hypothetical protein                               |
| Os05g0307100 | 2.37    | 1.34E-02 | Hypothetical protein                               |
| Os05g0417400 | 7.79    | 1.91E-03 | Universal stress protein family protein            |
| Os05g0424000 | 1.67    | 9.27E-04 | Amino acid transporter (OsAAP7)                    |
| Os05g0429900 | 2.02    | 5.71E-03 | Similar to MybHv5                                  |
| Os05g0453700 | 3.59    | 4.34E-02 | Similar to USP family protein                      |
| Os05g0477600 | 2.39    | 3.42E-04 | Alpha-expansin (OsEXPA4)                           |
| Os05g0507000 | 6.25    | 1.56E-02 | Conserved hypothetical protein                     |
| Os05g0515500 | 3.69    | 7.63E-04 | Similar to O-methyltransferase ZRP4                |
| Os05g0557100 | 2.50    | 4.41E-02 | Peptidase A1 domain containing protein             |
| Os05g0566800 | 2.05    | 1.02E-02 | Cold acclimation protein COR413-TM1                |

|              |       |          |                                                                                     |
|--------------|-------|----------|-------------------------------------------------------------------------------------|
| Os05g0580000 | 2.10  | 5.78E-04 | ADP glucose pyrophosphorylase large subunit 1 (AGPL1)                               |
| Os05g0588800 | 2.35  | 1.83E-02 | Similar to Yarrowia lipolytica chromosome D of strain CLIB99 of Yarrowia lipolytica |
| Os06g0141200 | 2.23  | 4.46E-02 | RNA-binding protein                                                                 |
| Os06g0163900 | 8.70  | 5.07E-04 | NB-ARC domain containing protein                                                    |
| Os06g0200800 | 3.94  | 1.71E-02 | Conserved hypothetical protein                                                      |
| Os06g0212900 | 2.01  | 1.93E-02 | Heat shock protein Hsp70 family protein                                             |
| Os06g0234200 | 2.18  | 2.79E-04 | Rac-like GTP-binding protein                                                        |
| Os06g0261300 | 3.79  | 1.35E-03 | Conserved hypothetical protein                                                      |
| Os06g0294200 | 2.44  | 1.50E-03 | Conserved hypothetical protein                                                      |
| Os06g0306600 | 2.14  | 2.56E-02 | Alpha/beta hydrolase fold-3 domain containing protein                               |
| Os06g0329900 | 2.20  | 1.52E-02 | SAM dependent carboxyl methyltransferase family protein. [Os06t0329900-01]          |
| Os06g0561000 | 2.57  | 6.02E-03 | Myo-inositol oxygenase                                                              |
| Os06g0602400 | 19.19 | 7.51E-03 | DEAD-box RNA helicase DEAD3                                                         |
| Os06g0697000 | 5.31  | 2.90E-02 | Xyloglucan endotransglycosylase                                                     |
| Os06g0726400 | 1.57  | 6.39E-03 | Branching enzyme I (BEI)                                                            |
| Os07g0110000 | 5.74  | 1.47E-04 | Hypothetical protein                                                                |
| Os07g0115300 | 2.05  | 3.13E-02 | Peroxidase 2                                                                        |
| Os07g0132100 | 5.51  | 8.98E-03 | Similar to lectin-like receptor kinase 7                                            |
| Os07g0137000 | 3.68  | 2.12E-04 | Myb transcription factor                                                            |
| Os07g0146800 | 8.84  | 2.99E-03 | Hypothetical conserved gene                                                         |
| Os07g0147600 | 2.56  | 4.39E-05 | Protein kinase                                                                      |
| Os07g0160100 | 2.27  | 6.63E-04 | YABBY protein (OsYAB1)                                                              |
| Os07g0241600 | 2.14  | 2.25E-02 | Hypothetical conserved gene                                                         |
| Os07g0457200 | 23.57 | 2.74E-03 | Hypothetical conserved gene                                                         |
| Os07g0520300 | 4.75  | 2.01E-02 | Cytochrome P450 family protein                                                      |
| Os07g0558900 | 3.39  | 1.41E-02 | Unknown                                                                             |
| Os07g0592100 | 2.36  | 4.87E-03 | Similar to Alcohol dehydrogenase-like protein                                       |
| Os07g0607400 | 10.80 | 1.40E-02 | Pectin lyase fold/virulence factor domain containing protein                        |
| Os07g0622400 | 2.53  | 7.63E-04 | Conserved hypothetical protein                                                      |



|              |        |          |                                                           |
|--------------|--------|----------|-----------------------------------------------------------|
| Os07g0641400 | 2.39   | 8.59E-03 | Hypothetical protein                                      |
| Os07g0647900 | 3.09   | 4.79E-04 | DEAD-like helicase                                        |
| Os08g0113700 | 2.21   | 1.59E-03 | Conserved hypothetical protein                            |
| Os08g0189600 | 2.88   | 4.93E-02 | <i>Oryza sativa</i> germin-like protein 8-7               |
| Os08g0193600 | 2.47   | 3.76E-03 | Hypothetical conserved gene                               |
| Os08g0193900 | 2.06   | 1.83E-02 | Cyclin-like F-box domain containing protein               |
| Os08g0213100 | 4.79   | 1.29E-02 | Hypothetical conserved gene                               |
| Os08g0240000 | 27.20  | 8.21E-04 | Similar to STF-1                                          |
| Os08g0246800 | 2.13   | 2.22E-02 | Conserved hypothetical protein                            |
| Os08g0389700 | 2.27   | 2.21E-02 | Protein of unknown function DUF81 family protein          |
| Os08g0410900 | 123.14 | 6.14E-06 | Hypothetical gene                                         |
| Os08g0439300 | 3.99   | 4.73E-02 | Conserved hypothetical protein                            |
| Os08g0457100 | 2.25   | 3.86E-02 | Conserved hypothetical protein                            |
| Os08g0495800 | 2.68   | 9.64E-04 | Similar to alkaline alpha galactosidase 3                 |
| Os08g0497300 | 2.11   | 1.86E-03 | alpha-tocopherol transport family protein                 |
| Os08g0499300 | 3.28   | 3.58E-03 | WRKY transcription factor 30                              |
| Os08g0502400 | 4.47   | 1.27E-02 | FAS1 domain domain containing protein                     |
| Os08g0527900 | 3.20   | 3.43E-02 | Peptidase                                                 |
| Os09g0298200 | 1.81   | 2.98E-03 | ADP glucose pyrophosphorylase small subunit 1 (AGPS1)     |
| Os09g0339600 | 2.10   | 5.08E-03 | Unknown                                                   |
| Os09g0391500 | 5.85   | 2.60E-02 | Hypothetical gene                                         |
| Os09g0412400 | 2.48   | 4.25E-02 | Conserved hypothetical protein                            |
| Os09g0418500 | 2.19   | 4.15E-02 | Similar to PnC401 homologue                               |
| Os09g0491900 | 8.59   | 4.49E-02 | Unknown                                                   |
| Os09g0501600 | 2.12   | 3.23E-02 | Similar to MYC1                                           |
| Os10g0107100 | 163.83 | 6.21E-05 | OB-fold domain containing protein                         |
| Os10g0111700 | 3.99   | 4.42E-03 | Similar to POT family protein, expressed                  |
| Os10g0133500 | 3.91   | 7.98E-04 | Transferase                                               |
| Os10g0157400 | 2.02   | 1.60E-02 | Serine/threonine protein kinase domain containing protein |

|              |        |          |                                                         |
|--------------|--------|----------|---------------------------------------------------------|
| Os10g0328100 | 4.01   | 1.02E-04 | Expressed protein                                       |
| Os10g0429400 | 2.40   | 2.93E-04 | Similar to BTB/POZ domain containing protein, expressed |
| Os10g0432200 | 2.55   | 3.34E-02 | Similar to 68 kDa protein HP68                          |
| Os10g0450900 | 2.18   | 1.43E-03 | Glycine-rich cell wall structural protein               |
| Os10g0479500 | 2.02   | 7.89E-03 | Lysine decarboxylase-like protein                       |
| Os10g0522500 | 2.58   | 3.70E-03 | Similar to predicted protein                            |
| Os10g0555900 | 7.35   | 1.38E-03 | Beta-expansin-3 (OsEXPB3)                               |
| Os10g0567900 | 14.60  | 5.73E-03 | HAT dimerisation domain containing protein              |
| Os11g0125900 | 2.24   | 4.06E-02 | ATP-diphosphohydrolase                                  |
| Os11g0196400 | 6.86   | 2.96E-04 | Non-protein coding transcript                           |
| Os11g0208000 | 3.59   | 3.14E-04 | Cyclin-like F-box domain containing protein             |
| Os11g0224300 | 322.40 | 1.10E-06 | Integrase, catalytic core domain containing protein     |
| Os11g0282700 | 14.60  | 9.47E-04 | Homeodomain-like containing protein                     |
| Os11g0286800 | 3.07   | 5.60E-04 | Cycloartenol synthase                                   |
| Os11g0289700 | 4.70   | 3.80E-03 | Unknown                                                 |
| Os11g0422000 | 77.02  | 1.31E-06 | Conserved hypothetical protein                          |
| Os11g0513000 | 3.62   | 9.54E-03 | Hypothetical conserved gene                             |
| Os11g0516800 | 2.01   | 5.23E-03 | Conserved hypothetical protein                          |
| Os11g0517400 | 2.46   | 1.91E-02 | Hypothetical protein                                    |
| Os11g0518600 | 2.82   | 2.02E-02 | Hypothetical protein                                    |
| Os11g0576700 | 3.55   | 1.17E-02 | ABC transporter                                         |
| Os11g0593100 | 3.98   | 1.40E-02 | Protein of unknown function DUF295 family protein       |
| Os12g0113600 | 50.62  | 4.85E-04 | Hypothetical protein                                    |
| Os12g0117900 | 2.42   | 6.60E-03 | Hypothetical conserved gene                             |
| Os12g0123500 | 2.03   | 2.78E-02 | ATP-diphosphatase                                       |
| Os12g0228500 | 3.43   | 4.54E-02 | Conserved hypothetical protein                          |
| Os12g0236800 | 22.31  | 2.79E-04 | Hypothetical conserved gene                             |
| Os12g0286200 | 3.26   | 4.21E-03 | Conserved hypothetical protein                          |
| Os12g0454600 | 2.03   | 2.48E-02 | Cupredoxin domain containing protein                    |

|                                     |       |          |                                                        |
|-------------------------------------|-------|----------|--------------------------------------------------------|
| Os12g0454800                        | 3.11  | 2.21E-02 | CHASE domain receptor-like serine/threonine kinase     |
| Os12g0508400                        | 2.81  | 1.46E-02 | Hypothetical protein                                   |
| Os12g0514100                        | 2.57  | 4.98E-03 | Ribosome associated membrane RAMP4 family protein      |
| Os12g0539800                        | 39.45 | 1.95E-04 | Unknown                                                |
| Os12g0554100                        | 3.31  | 7.34E-03 | Protein of unknown function DUF231                     |
| <b>B (Down-regulated 129 genes)</b> |       |          |                                                        |
| Os01g0101800                        | 0.357 | 2.12E-03 | Conserved hypothetical protein                         |
| Os01g0146200                        | 0.456 | 1.14E-03 | Conserved hypothetical protein                         |
| Os01g0162300                        | 0.411 | 2.02E-02 | Leucine-rich repeat, plant specific containing protein |
| Os01g0175600                        | 0.356 | 1.50E-02 | Bicarbonate transporter                                |
| Os01g0253900                        | 0.390 | 2.15E-03 | Lipase                                                 |
| Os01g0275900                        | 0.478 | 2.83E-02 | Hypothetical conserved gene                            |
| Os01g0339500                        | 0.215 | 3.31E-03 | Conserved hypothetical protein                         |
| Os01g0391100                        | 0.349 | 1.28E-02 | Hypothetical gene                                      |
| Os01g0511800                        | 0.414 | 4.49E-02 | Conserved hypothetical protein                         |
| Os01g0512400                        | 0.460 | 1.91E-03 | Conserved hypothetical protein                         |
| Os01g0516400                        | 0.347 | 3.90E-02 | Stress-responsive protein                              |
| Os01g0603200                        | 0.487 | 1.23E-02 | Conserved hypothetical protein                         |
| Os01g0632000                        | 0.436 | 3.35E-02 | Conserved hypothetical protein                         |
| Os01g0733100                        | 0.341 | 4.05E-02 | Hypothetical conserved gene                            |
| Os01g0872900                        | 0.398 | 2.56E-03 | Protein of unknown function DUF635 family protein      |
| Os01g0873000                        | 0.366 | 4.19E-03 | Hypothetical conserved gene                            |
| Os01g0909500                        | 0.457 | 4.79E-03 | Unknown                                                |
| Os01g0974600                        | 0.463 | 7.08E-03 | Similar to RNA-binding glycine rich protein (RGP-2)    |
| Os02g0129000                        | 0.138 | 3.57E-03 | Hypothetical conserved gene                            |
| Os02g0139500                        | 0.240 | 9.93E-04 | Similar to cycloartenol synthase                       |
| Os02g0202200                        | 0.328 | 7.29E-04 | Rice SPX domain gene (OsSPX1)                          |
| Os02g0203200                        | 0.460 | 1.88E-02 | Conserved hypothetical protein                         |

|              |       |          |                                                                |
|--------------|-------|----------|----------------------------------------------------------------|
| Os02g0261900 | 0.496 | 2.30E-02 | Unknown                                                        |
| Os02g0597300 | 0.364 | 1.37E-02 | Hypothetical protein                                           |
| Os02g0635600 | 0.452 | 1.80E-03 | Tyrosine protein kinase domain containing protein              |
| Os02g0669700 | 0.455 | 2.34E-02 | Nucleotide-binding, alpha-beta plait domain containing protein |
| Os02g0670700 | 0.357 | 3.46E-02 | Hypothetical conserved gene                                    |
| Os02g0694600 | 0.328 | 1.46E-03 | Hypothetical conserved gene                                    |
| Os02g0770800 | 0.222 | 2.18E-02 | Nitrate reductase                                              |
| Os02g0806900 | 0.260 | 8.16E-04 | Pyridoxal phosphate-dependent transferase                      |
| Os02g0807100 | 0.219 | 1.04E-02 | Hypothetical gene                                              |
| Os02g0807300 | 0.260 | 1.47E-03 | Conserved hypothetical protein                                 |
| Os03g0111600 | 0.422 | 2.19E-02 | Protein of unknown function DUF1618 domain containing protein  |
| Os03g0150800 | 0.418 | 9.37E-05 | Phosphate transporter (OsPht1;2; OsPT2)                        |
| Os03g0197200 | 0.390 | 4.50E-02 | Sorbitol transporter                                           |
| Os03g0306700 | 0.248 | 2.70E-03 | bZIP transcription factor                                      |
| Os03g0365200 | 0.473 | 2.05E-02 | Conserved hypothetical protein                                 |
| Os03g0579800 | 0.295 | 2.74E-03 | Hypothetical protein                                           |
| Os03g0582900 | 0.124 | 2.23E-02 | Non-protein coding transcript                                  |
| Os03g0598500 | 0.427 | 7.97E-03 | Conserved hypothetical protein                                 |
| Os03g0727000 | 0.448 | 4.57E-02 | Similar to homeobox protein OSH1                               |
| Os04g0116200 | 0.045 | 2.24E-02 | Protein of unknown function DUF827                             |
| Os04g0118800 | 0.450 | 5.80E-03 | NB-ARC domain containing protein                               |
| Os04g0168300 | 0.240 | 2.18E-02 | Hypothetical protein                                           |
| Os04g0186400 | 0.408 | 9.38E-03 | Phosphate transporter (OsPht1;4; OsPT4)                        |
| Os04g0208200 | 0.197 | 3.58E-02 | Cysteine proteinase                                            |
| Os04g0286500 | 0.476 | 7.03E-03 | Hypothetical conserved gene                                    |
| Os04g0337300 | 0.499 | 8.43E-04 | Hypothetical protein                                           |
| Os04g0377400 | 0.427 | 4.60E-03 | Conserved hypothetical protein                                 |
| Os04g0394100 | 0.405 | 6.27E-03 | Glycerophosphoryl diester phosphodisterase                     |
| Os04g0398600 | 0.369 | 3.56E-02 | Similar to pectin-glucuronyltransferase                        |

|              |       |          |                                                                 |
|--------------|-------|----------|-----------------------------------------------------------------|
| Os04g0513700 | 0.361 | 4.12E-02 | Hypothetical conserved gene                                     |
| Os04g0528400 | 0.375 | 4.92E-04 | ABC transporter                                                 |
| Os04g0574800 | 0.390 | 2.13E-02 | Similar to dihydrodipicolinate synthase 1                       |
| Os05g0155000 | 0.420 | 8.27E-04 | Similar to protein MFP-b                                        |
| Os05g0163700 | 0.484 | 2.62E-02 | Acyl-coenzyme A oxidase 4                                       |
| Os05g0241100 | 0.332 | 3.13E-04 | Leucyl-tRNA synthetase                                          |
| Os05g0268500 | 0.332 | 4.30E-02 | Similar to serine carboxypeptidase II chains A and B            |
| Os05g0269500 | 0.413 | 6.43E-03 | Generative cell specific-1, HAP2-GCS1 domain containing protein |
| Os05g0384600 | 0.492 | 8.59E-03 | Similar to ATPase                                               |
| Os05g0436000 | 0.425 | 2.94E-02 | Unknown                                                         |
| Os05g0521300 | 0.435 | 4.80E-02 | Similar to histidine-containing phosphotransfer protein 4       |
| Os05g0531200 | 0.425 | 8.86E-03 | Pollen Ole e 1 allergen and extensin domain containing protein  |
| Os05g0571300 | 0.326 | 3.61E-02 | Hypothetical protein                                            |
| Os05g0571700 | 0.362 | 2.52E-04 | Cyclin-like F-box domain containing protein                     |
| Os06g0182100 | 0.414 | 3.89E-04 | Hypothetical conserved gene                                     |
| Os06g0206700 | 0.323 | 7.10E-03 | Similar to kinesin-related protein                              |
| Os06g0273400 | 0.433 | 1.52E-02 | Conserved hypothetical protein                                  |
| Os06g0363900 | 0.047 | 5.04E-05 | Similar to stable protein 1                                     |
| Os06g0367500 | 0.159 | 3.50E-02 | B-cell receptor-associated 31-like domain containing protein    |
| Os06g0472000 | 0.483 | 1.39E-02 | Methionine sulphoxide reductase B domain containing protein     |
| Os06g0488200 | 0.461 | 1.27E-02 | Similar to myosin heavy chain                                   |
| Os06g0553200 | 0.350 | 4.67E-02 | Conserved hypothetical protein                                  |
| Os06g0579200 | 0.029 | 1.12E-02 | Unknown                                                         |
| Os06g0597900 | 0.481 | 2.55E-02 | SOUL haem-binding protein domain containing protein             |
| Os06g0678700 | 0.484 | 4.09E-02 | Hypothetical conserved gene                                     |
| Os06g0711200 | 0.470 | 6.12E-03 | Conserved hypothetical protein                                  |
| Os07g0100600 | 0.334 | 1.77E-03 | Peptide transporter                                             |
| Os07g0168800 | 0.357 | 1.34E-02 | Zinc finger, AN1-type domain containing protein                 |
| Os07g0200500 | 0.467 | 6.76E-03 | Similar to OSIGBa0126B18.3 protein                              |

|              |       |          |                                                              |
|--------------|-------|----------|--------------------------------------------------------------|
| Os07g0215500 | 0.434 | 3.81E-02 | Allergenic protein                                           |
| Os07g0291400 | 0.314 | 4.42E-02 | Similar to acrosin precursor                                 |
| Os07g0301000 | 0.045 | 4.15E-05 | Similar to stable protein 1                                  |
| Os07g0414200 | 0.311 | 3.57E-02 | Methyltransferase, METTL2                                    |
| Os07g0435900 | 0.029 | 2.48E-05 | SET domain containing protein                                |
| Os07g0456400 | 0.060 | 1.67E-05 | LUC7 related family protein                                  |
| Os07g0513200 | 0.468 | 1.57E-02 | Pentatricopeptide repeat domain containing protein           |
| Os07g0538700 | 0.393 | 3.80E-02 | Hypothetical conserved gene                                  |
| Os07g0539300 | 0.421 | 3.29E-03 | Glycoside hydrolase, family 17 protein                       |
| Os07g0565800 | 0.494 | 8.13E-03 | Conserved hypothetical protein                               |
| Os07g0658300 | 0.451 | 3.24E-03 | Pleckstrin homology-type domain containing protein           |
| Os08g0100300 | 0.012 | 2.84E-04 | Non-protein coding transcript                                |
| Os08g0127800 | 0.492 | 1.31E-02 | Conserved hypothetical protein                               |
| Os08g0141800 | 0.385 | 4.14E-02 | Hypothetical conserved gene                                  |
| Os08g0244500 | 0.400 | 7.44E-03 | Glycoside hydrolase, family 17 protein                       |
| Os08g0290700 | 0.255 | 3.31E-02 | Winged helix repressor DNA-binding domain containing protein |
| Os08g0367300 | 0.192 | 2.94E-04 | Hypothetical conserved gene                                  |
| Os08g0440300 | 0.483 | 2.27E-02 | Ribonuclease CAF1 family protein                             |
| Os08g0528200 | 0.491 | 3.07E-02 | Conserved hypothetical protein                               |
| Os08g0532600 | 0.498 | 4.79E-03 | Similar to peroxidase                                        |
| Os08g0561000 | 0.469 | 7.03E-03 | Homeodomain-like containing protein                          |
| Os09g0129600 | 0.242 | 4.57E-02 | Recombinase, conserved site domain containing protein        |
| Os09g0269900 | 0.424 | 3.87E-02 | Conserved hypothetical protein                               |
| Os09g0286800 | 0.180 | 3.79E-02 | Unknown                                                      |
| Os09g0423800 | 0.450 | 1.05E-02 | Similar to AP2-1 protein                                     |
| Os10g0128400 | 0.263 | 6.09E-03 | Conserved hypothetical protein                               |
| Os10g0149200 | 0.434 | 3.91E-02 | Protein of unknown function DUF1210 family protein           |
| Os10g0170600 | 0.160 | 2.13E-03 | HAT family dimerisation domain containing protein            |
| Os10g0343500 | 0.094 | 1.55E-04 | Hypothetical conserved gene                                  |

|              |       |          |                                                   |
|--------------|-------|----------|---------------------------------------------------|
| Os10g0450400 | 0.475 | 2.42E-03 | Protein of unknown function DUF594 family protein |
| Os10g0515100 | 0.389 | 1.01E-02 | Conserved hypothetical protein                    |
| Os10g0529600 | 0.413 | 1.51E-02 | Conserved hypothetical protein                    |
| Os11g0102900 | 0.393 | 8.26E-03 | Unknown                                           |
| Os11g0117200 | 0.356 | 4.73E-02 | Hypothetical conserved gene                       |
| Os11g0294400 | 0.453 | 1.45E-02 | WW/Rsp5/WWP domain containing protein             |
| Os11g0428500 | 0.370 | 6.48E-04 | Conserved hypothetical protein                    |
| Os11g0461000 | 0.380 | 3.23E-02 | Unknown                                           |
| Os11g0470200 | 0.393 | 4.22E-02 | Protein kinase, expressed                         |
| Os11g0547300 | 0.211 | 3.16E-02 | Hypothetical conserved gene                       |
| Os11g0625000 | 0.275 | 1.14E-02 | Expressed protein                                 |
| Os11g0674300 | 0.299 | 2.33E-02 | Hypothetical conserved gene                       |
| Os12g0129700 | 0.221 | 2.08E-02 | Cyclin-like F-box domain containing protein       |
| Os12g0152200 | 0.493 | 2.97E-03 | Cyclin-like F-box domain containing protein       |
| Os12g0199000 | 0.182 | 5.10E-03 | Hypothetical conserved gene                       |
| Os12g0244800 | 0.445 | 2.03E-02 | Hypothetical protein                              |
| Os12g0472500 | 0.411 | 6.67E-03 | Glutelin family protein                           |
| Os12g0614900 | 0.396 | 2.48E-02 | Hypothetical gene                                 |
| Os12g0634200 | 0.305 | 4.42E-02 | Hypothetical conserved gene                       |

**Supplemental Table S3.** Statistical analyses of microarray and qRT-PCR data for genes in flag leaves of *pPP2::AtSUC2* rice plants (line 51) on the 10<sup>th</sup> day after fertilization

| Gene                                                           | Accession Number | Microarray |          | qRT-PCR    |          |
|----------------------------------------------------------------|------------------|------------|----------|------------|----------|
|                                                                |                  | Expression | p-Value  | Expression | p-Value  |
| <b>Carbohydrate transport and metabolism</b>                   |                  |            |          |            |          |
| Fructose-2, 6-bisphosphatase                                   | Os05g0164400     | 5.24**     | 4.40E-03 | 7.89**     | 6.35E-03 |
| Malic acid transport protein                                   | Os01g0385400     | 6.48**     | 3.73E-02 | 16.49**    | 1.06E-03 |
| Beta-amylase                                                   | Os07g0543300     | 2.20**     | 7.41E-03 | 5.60**     | 7.09E-04 |
| Fructose-1,6-bisphosphatase                                    | Os03g0267500     | 0.45**     | 3.33E-02 | 0.23**     | 4.90E-03 |
| ADP glucose pyrophosphorylase large subunit 2 ( <i>AGPL2</i> ) | Os01g0633100     | 1.85**     | 5.05E-02 | 2.15**     | 4.57E-03 |
| Granule-bound starch synthase I ( <i>GBSSI</i> )               | Os06g0133000     | 3.06**     | 1.78E-02 | 1.73**     | 3.34E-03 |
| Branching enzyme I ( <i>BEI</i> )                              | Os06g0726400     | 1.52**     | 5.56E-03 | 1.61**     | 7.56E-04 |
| UDP-glucose pyrophosphorylase 2 ( <i>UGP2</i> )                | Os02g0117700     | 1.96**     | 2.42E-02 | 2.55**     | 3.66E-03 |
| Cytosolic fructose-1,6-bisphosphatase 1 ( <i>cyFBP1</i> )      | Os01g0866400     | 1.59**     | 2.49E-02 | 1.67**     | 4.73E-04 |
| Sucrose transporter 1 ( <i>OsSUT1</i> )                        | Os03g0170900     | 3.32**     | 9.43E-03 | 2.50**     | 3.57E-05 |
| <b>Amino acid transport and metabolism</b>                     |                  |            |          |            |          |
| Glutathione S-transferase                                      | Os10g0525400     | 8.80**     | 2.40E-02 | 32.65**    | 8.67E-05 |
| Oligopeptidase A ( <i>OsRR3</i> )                              | Os02g0830200     | 2.97**     | 5.80E-02 | 16.30**    | 1.24E-04 |
| Asparagine synthetase                                          | Os06g0265100     | 465.61**   | 1.10E-07 | 123.90**   | 4.53E-04 |
| Aspartic proteinase nepenthesin-2                              | Os06g0304600     | 0.49**     | 4.11E-02 | 0.35**     | 9.27E-05 |
| Amino acid transporter-like 5 ( <i>OsATL5</i> )                | Os06g0633800     | 1.53**     | 2.33E-02 | 2.71**     | 5.53E-03 |
| Peptide transporter 1 ( <i>OsPTR1</i> )                        | Os07g0100600     | 0.33**     | 1.76E-03 | 0.25**     | 3.23E-04 |
| Nitrate transporter 2.3a ( <i>OsNRT2.3a</i> )                  | Os01g0704100     | 1.63**     | 3.80E-02 | 1.73**     | 3.45E-03 |
| Ammonium transporter 1.2 ( <i>OsAMT1.2</i> )                   | Os02g0620500     | 1.67**     | 2.80E-01 | 1.82**     | 2.30E-02 |



|                                                                           |              |         |          |         |          |
|---------------------------------------------------------------------------|--------------|---------|----------|---------|----------|
| <b>Lipid transport and metabolism</b>                                     |              |         |          |         |          |
| Lipase ( <i>OsPR10</i> )                                                  | Os12g0555000 | 5.13**  | 5.28E-03 | 10.77** | 6.54E-03 |
| O-methyltransferase                                                       | Os05g0515500 | 5.71**  | 6.64E-04 | 20.34** | 5.33E-05 |
| <b>Inorganic transport and metabolism</b>                                 |              |         |          |         |          |
| Major facilitator superfamily protein                                     | Os04g0555300 | 0.43**  | 7.72E-03 | 0.30**  | 4.56E-04 |
| ABC transporter                                                           | Os04g0528400 | 0.33**  | 1.32E-04 | 0.47**  | 2.35E-03 |
| <b>Transcription</b>                                                      |              |         |          |         |          |
| A-type response regulator gene ( <i>OsRR3</i> )                           | Os02g0830200 | 2.97**  | 5.80E-02 | 3.40**  | 2.18E-03 |
| Rice prolamin box binding factor                                          | Os02g0252400 | 8.42**  | 7.51E-03 | 7.89**  | 1.96E-04 |
| WRKY transcription factor                                                 | Os11g0491600 | 12.63** | 1.69E-04 | 15.70** | 3.88E-04 |
| Transcriptional factor B3 family protein                                  | Os01g0723700 | 2.21**  | 7.34E-04 | 3.20**  | 4.35E-03 |
| Transcription elongation factor S-II                                      | Os06g0595900 | 2.28**  | 2.94E-03 | 4.08**  | 8.06E-04 |
| WRKY transcription factor 19                                              | Os05g0571200 | 4.20**  | 1.29E-02 | 3.80**  | 1.16E-03 |
| Basic helix-loop-helix dimerization region bHLH domain containing protein | Os04g0599300 | 3.42**  | 4.77E-02 | 13.50** | 1.32E-03 |
| <b>Energy production and conversion</b>                                   |              |         |          |         |          |
| Photosystem II oxygen evolving complex protein PsbQ                       | Os02g0631200 | 1.57**  | 1.85E-02 | 5.90**  | 3.20E-04 |
| Similar to Low molecular mass early light-inducible protein HV90          | Os01g0246400 | 0.06**  | 1.53E-02 | 0.43**  | 6.45E-03 |
| <b>Signal transduction mechanisms</b>                                     |              |         |          |         |          |
| Brassinosteroid up-regulated 1 ( <i>BUI</i> )                             | Os06g0226500 | 0.39**  | 1.87E-01 | 0.45**  | 3.45E-03 |

|                                                                      |              |         |          |         |          |
|----------------------------------------------------------------------|--------------|---------|----------|---------|----------|
| Auxin-responsive protein ( <i>IAA12</i> )                            | Os02g0805300 | 1.57**  | 0.028131 | 4.70**  | 2.10E-03 |
| Auxin response factor 14                                             | Os05g0515500 | 5.72**  | 6.64E-04 | 14.32** | 1.23E-04 |
| Ethylene response factor                                             | Os07g0617200 | 3.16**  | 3.53E-04 | 3.90**  | 4.50E-04 |
| A-type response regulator 3, cytokinin signalling                    | Os02g0830200 | 2.97**  | 5.8E-03  | 6.45**  | 3.22E-04 |
| Calmodulin binding protein-like family protein                       | Os12g0547600 | 3.18**  | 6.60E-03 | 10.34   | 3.45E-04 |
| <b>Defense mechanisms</b>                                            |              |         |          |         |          |
| Small heat shock protein                                             | Os05g0296800 | 10.47** | 0.001661 | 45.67** | 2.34E-03 |
| Universal stress protein family protein                              | Os05g0417400 | 9.31**  | 6.16E-05 | 17.32** | 6.45E-06 |
| Calcium/calmodulin-dependent serine/threonine-protein kinase         | Os07g0641400 | 3.07**  | 9.50E-02 | 6.02**  | 3.23E-04 |
| Calcium-dependent protein kinase                                     | Os08g0540400 | 3.89**  | 3.71E-02 | 6.89**  | 2.12E-03 |
| Universal stress protein                                             | Os05g0417400 | 9.30**  | 6.16E-05 | 19.47** | 7.17E-06 |
| Heat shock protein DnaJ                                              | Os01g0606900 | 2.05**  | 4.28E-02 | 5.28**  | 3.45E-03 |
| Resistance protein candidate                                         | Os08g0124700 | 2.28**  | 1.05E-02 | 6.23**  | 2.34E-04 |
| Pathogenesis-related protein                                         | Os12g0555300 | 2.83**  | 5.64E-03 | 4.23**  | 3.98E-04 |
| <b>Cell wall/membrane/envelope biogenesis</b>                        |              |         |          |         |          |
| Expansin-B1 ( <i>OsEXPB1</i> )                                       | Os03g0106500 | 5.02**  | 2.50E-04 | 13.56** | 3.45E-04 |
| <b>Secondary metabolites biosynthesis, transport, and catabolism</b> |              |         |          |         |          |
| Cis-zeatin O-glucosyltransferase 1                                   | Os04g0565200 | 2.47**  | 3.69E-02 | 4.36**  | 6.45E-04 |
| Chalcone reductase                                                   | Os10g0113000 | 2.02**  | 6.30E-03 | 4.23**  | 5.43E-04 |
| Chitinase                                                            | Os01g0687400 | 2.28**  | 1.20E-02 | 7.39**  | 3.45E-04 |
| Cytochrome P450                                                      | Os01g0602200 | 2.06**  | 1.84E-02 | 9.34**  | 2.39E-03 |
| Cytochrome b5                                                        | Os05g0108900 | 2.25**  | 1.60E-01 | 3.38**  | 1.29E-03 |

|                                                                       |              |          |          |          |          |
|-----------------------------------------------------------------------|--------------|----------|----------|----------|----------|
| C4-dicarboxylate transporter/malic acid transport protein             | Os01g0385400 | 6.47**   | 3.73E-03 | 13.32**  | 4.56E-04 |
| <b>Nucleotide transport and metabolism</b>                            |              |          |          |          |          |
| Deoxynucleoside kinase                                                | Os05g0124700 | 65.42**  | 4.49E-04 | 134.45** | 5.89E-05 |
| NADPH-dependent codeinone reductase                                   | Os10g0114300 | 11.73**  | 5.67E-04 | 23.69**  | 7.45E-04 |
| Nucleoside phosphorylase                                              | Os06g0112100 | 0.39**   | 2.64E-03 | 0.35**   | 3.45E-03 |
| RNA-binding protein                                                   | Os06g0141200 | 0.26**   | 1.27E-02 | 0.12**   | 3.20E-04 |
| <b>General function prediction only</b>                               |              |          |          |          |          |
| Similar to stable protein 1                                           | Os06g0363900 | 0.17**   | 4.40E-04 | 0.24**   | 1.22E-03 |
| Conserved hypothetical protein                                        | Os04g0510000 | 755.71** | 4.80E-07 | 568.98** | 5.76E-07 |
| Probenazole-inducible protein                                         | Os12g0555000 | 5.13**   | 5.28E-03 | 7.32**   | 3.08E-05 |
| Myosin heavy chain                                                    | Os06g0488200 | 0.23**   | 4.81E-05 | 0.67**   | 5.76E-04 |
| Pollen-specific protein                                               | Os05g0196200 | 2.26**   | 1.99E-02 | 3.49**   | 2.30E-04 |
| Nonphototrophic hypocotyl 1a                                          | Os12g0101800 | 4.10**   | 9.43E-05 | 9.87**   | 9.78E-06 |
| Similar to SIPL                                                       | Os10g0419400 | 2.66**   | 1.37E-03 | 6.32**   | 3.49E-05 |
| Integrase                                                             | Os11g0224300 | 181.04** | 3.07E-06 | 172.12** | 3.45E-07 |
| Alpha/beta hydrolase                                                  | Os02g0207900 | 3.80**   | 4.39E-02 | 5.87**   | 7.83E-04 |
| Serine/threonine protein kinase                                       | Os05g0256100 | 0.32**   | 1.51E-03 | 0.25**   | 2.45E-06 |
| Glycine-rich protein                                                  | Os06g0317200 | 0.42**   | 2.10E-02 | 0.34**   | 7.56E-04 |
| Late embryogenesis abundant (LEA) group 1 family protein              | Os08g0327700 | 0.24**   | 3.75E-02 | 0.25**   | 3.87E-04 |
| Haem peroxidase                                                       | Os06g0521400 | 2.06**   | 4.54E-02 | 4.37**   | 3.98E-05 |
| <b>Cell cycle control, cell division, and chromosome partitioning</b> |              |          |          |          |          |
| Cyclin-like F-box domain containing protein                           | Os06g0713400 | 0.41**   | 1.14E-02 | 0.33**   | 1.23E-04 |

|                                             |              |        |          |        |          |
|---------------------------------------------|--------------|--------|----------|--------|----------|
| Cyclin-like F-box domain containing protein | Os01g0595900 | 0.47** | 1.93E-02 | 0.23** | 3.98E-03 |
|---------------------------------------------|--------------|--------|----------|--------|----------|

**Supplemental Table S4.** Statistical analyses of microarray and qRT-PCR data for genes in developing seeds of *pPPP2::AtSUC2* rice plants (line 51) on the 10<sup>th</sup> day after fertilization

| Gene                                                           | Accession Number | Microarray |          | qRT-PCR    |          |
|----------------------------------------------------------------|------------------|------------|----------|------------|----------|
|                                                                |                  | Expression | p-Value  | Expression | p-Value  |
| <b>Carbohydrate transport and metabolism</b>                   |                  |            |          |            |          |
| Ribosome associated membrane RAMP4 family protein              | Os12g0514100     | 2.57**     | 4.98E-01 | 3.20**     | 5.72E-03 |
| Glutathione-conjugate transporter                              | Os04g0209300     | 2.61**     | 2.96E-02 | 2.56**     | 3.65E-03 |
| Tonoplast intrinsic protein ( <i>OsTIP4;1</i> )                | Os05g0231700     | 2.21**     | 1.26E-01 | 2.45**     | 2.13E-02 |
| Sorbitol transporter                                           | Os03g0197200     | 0.39**     | 4.50E-02 | 0.25**     | 5.33E-03 |
| Branching enzyme I ( <i>BEI</i> )                              | Os06g0726400     | 1.57**     | 6.39E-02 | 1.92**     | 3.56E-02 |
| ADP glucose pyrophosphorylase large subunit 1 ( <i>AGPL1</i> ) | Os05g0580000     | 2.09**     | 5.78E-02 | 2.57**     | 3.45E-04 |
| ADP glucose pyrophosphorylase small subunit 1 ( <i>AGPS1</i> ) | Os09g0298200     | 1.81**     | 2.98E-02 | 1.93**     | 1.23E-04 |
| <b>Amino acid transport and metabolism</b>                     |                  |            |          |            |          |
| Pleckstrin homology-type domain containing protein             | Os07g0658300     | 0.33**     | 4.30E-02 | 0.25**     | 2.32E-03 |
| Nitrate reductase [NAD(P)H] (EC 1.7.1.2)                       | Os02g0770800     | 0.22**     | 2.18E-02 | 0.36**     | 3.12E-03 |
| Peptidase (Ubiquitin carboxyl-terminal hydrolase)              | Os08g0527900     | 3.20**     | 3.43E-02 | 3.00**     | 4.58E-03 |
| Lysine decarboxylase-like protein                              | Os10g0479500     | 2.02**     | 7.89E-03 | 4.67**     | 3.20E-03 |
| Glutamate decarboxylase                                        | Os04g0447800     | 6.15**     | 3.03E-03 | 10.45**    | 4.50E-04 |
| Glutamate formiminotransferase                                 | Os03g0582000     | 2.24**     | 4.94E-02 | 3.21**     | 5.65E-04 |
| Amino acid transporter ( <i>OsAAP7</i> )                       | Os05g0424000     | 1.66**     | 9.27E-02 | 1.99**     | 3.66E-03 |
| Globulin1                                                      | Os03g0663800     | 1.60**     | 4.27E-02 | 1.92**     | 5.76E-03 |
| <b>Lipid transport and metabolism</b>                          |                  |            |          |            |          |
| Lipase                                                         | Os01g0253900     | 0.39**     | 2.15E-03 | 0.22**     | 4.50E-04 |

|                                                                                  |              |         |          |         |          |
|----------------------------------------------------------------------------------|--------------|---------|----------|---------|----------|
| Lipase-like protein                                                              | Os01g0652300 | 2.89**  | 2.97E-02 | 5.67**  | 3.22E-04 |
| Lipid transfer protein                                                           | Os03g0793800 | 6.09**  | 2.19E-02 | 8.98**  | 3.45E-04 |
| alpha-tocopherol transport family protein                                        | Os08g0497300 | 2.11**  | 1.86E-02 | 5.33**  | 9.53E-04 |
| Acyl-coenzyme A oxidase                                                          | Os05g0163700 | 0.49**  | 2.62E-02 | 0.33**  | 1.23E-03 |
|                                                                                  |              |         |          |         |          |
| <b>Inorganic transport and metabolism</b>                                        |              |         |          |         |          |
| Potassium transporter (OsHAK5)                                                   | Os01g0930400 | 4.87**  | 2.13E-02 | 5.66**  | 3.40E-03 |
| Phosphate transporter ( <i>OsPht1;2; OsPT2</i> )                                 | Os03g0150800 | 0.42**  | 9.37E-05 | 0.33**  | 2.38E-04 |
| Phosphate transporter ( <i>OsPht1;4; OsPT4</i> )                                 | Os04g0186400 | 0.41**  | 9.38E-03 | 0.54**  | 3.23E-03 |
| ABC transporter                                                                  | Os11g0576700 | 3.55**  | 1.17E-02 | 4.50**  | 2.39E-03 |
| Heavy metal transporter ( <i>Pyricularia oryzae</i> resistance-21, <i>pi21</i> ) | Os04g0401000 | 4.63**  | 1.17E-02 | 3.78**  | 9.25E-04 |
| ABC transporter                                                                  | Os04g0528400 | 0.38**  | 4.92E-04 | 0.45**  | 2.23E-05 |
| Bicarbonate transporter                                                          | Os01g0175600 | 0.36**  | 1.50E-02 | 0.56**  | 8.67E-04 |
|                                                                                  |              |         |          |         |          |
| <b>Secondary metabolites biosynthesis, transport, and catabolism</b>             |              |         |          |         |          |
| O-methyltransferase                                                              | Os04g0175600 | 2.56**  | 7.64E-03 | 4.34**  | 2.56E-03 |
| Protochlorophyllide reductase                                                    | Os04g0678700 | 2.02**  | 2.14E-02 | 5.39**  | 9.12E-03 |
| Squalene cyclase domain containing protein                                       | Os11g0286800 | 2.10**  | 4.40E-03 | 4.32**  | 4.88E-03 |
| Cytochrome P450                                                                  | Os07g0520300 | 4.75**  | 2.01E-02 | 8.43**  | 2.30E-03 |
| Xyloglucan endotransglycosylase                                                  | Os06g0697000 | 5.31**  | 2.90E-02 | 8.90**  | 4.98E-04 |
| Cycloartenol synthase                                                            | Os11g0286800 | 3.07**  | 5.60E-04 | 6.56**  | 5.65E-04 |
| Glycoside hydrolase                                                              | Os08g0244500 | 0.40**  | 7.44E-03 | 0.33**  | 8.66E-03 |
| Kaurene synthase A                                                               | Os02g0278700 | 4.31**  | 2.29E-02 | 4.89**  | 5.45E-03 |
| Sulfotransferase                                                                 | Os04g0526300 | 6.38**  | 4.17E-03 | 9.76**  | 7.12E-03 |
| Dimethylaniline monooxygenase                                                    | Os04g0223500 | 10.74** | 3.50E-04 | 15.87** | 3.12E-03 |

|                                                                       |              |         |          |         |          |
|-----------------------------------------------------------------------|--------------|---------|----------|---------|----------|
| NADPH: protochlorophyllide oxidoreductase A ( <i>OsPORA</i> )         | Os04g0678700 | 2.02**  | 2.14E-01 | 5.96**  | 5.67E-03 |
|                                                                       |              |         |          |         |          |
| <b>Cell cycle control, cell division, and chromosome partitioning</b> |              |         |          |         |          |
| Cyclin-D5-1 ( <i>CYCD5.1</i> )                                        | Os03g0617500 | 2.38**  | 2.22E-01 | 4.72**  | 2.30E-03 |
| Cyclins in embryo and endosperm development ( <i>CycB1;1</i> )        | Os01g0805600 | 4.54**  | 1.50E-01 | 10.23** | 3.40E-04 |
| Cyclin-like F-box domain containing protein                           | Os08g0193900 | 2.06**  | 1.82E-02 | 1.89**  | 1.02E-03 |
| Cyclin-like F-box domain containing protein                           | Os04g0208500 | 5.17**  | 1.58E-02 | 7.23**  | 2.30E-04 |
| Cyclin-like F-box domain containing protein                           | Os12g0129700 | 0.22**  | 2.08E-02 | 0.23**  | 3.45E-03 |
|                                                                       |              |         |          |         |          |
| <b>Transcription</b>                                                  |              |         |          |         |          |
| A-type response regulator 1 ( <i>OsRRI</i> )                          | Os04g0442300 | 2.71**  | 3.93E-01 | 4.50**  | 4.21E-03 |
| YABBY protein ( <i>OsYABI</i> )                                       | Os07g0160100 | 2.27**  | 6.63E-04 | 3.77**  | 2.30E-03 |
| Rice prolamin box binding factor ( <i>RPBF</i> )                      | Os02g0252400 | 11.15** | 6.89E-02 | 20.89** | 4.20E-04 |
| Transcriptional factor B3 family protein                              | Os01g0723700 | 2.13**  | 3.87E-02 | 3.31**  | 3.25E-04 |
| WRKY transcription factor 30                                          | Os08g0499300 | 3.28**  | 3.58E-03 | 5.34**  | 3.22E-03 |
| bZIP transcription factor                                             | Os03g0306700 | 0.25**  | 2.70E-02 | 0.45**  | 2.30E-03 |
| Myb transcription factor                                              | Os07g0137000 | 3.68**  | 2.12E-02 | 4.24**  | 4.23E-03 |
|                                                                       |              |         |          |         |          |
| <b>Defense mechanisms</b>                                             |              |         |          |         |          |
| Senescence-associated protein DIN1                                    | Os04g0249600 | 4.13**  | 3.97E-04 | 7.20**  | 6.32E-03 |
| Peroxidase 2                                                          | Os07g0115300 | 2.05**  | 3.13E-02 | 4.32**  | 2.13E-03 |
| Heat shock protein Hsp70 family protein                               | Os06g0212900 | 2.01**  | 1.93E-02 | 2.08**  | 4.78E-03 |
| Cold acclimation protein COR413-TM1                                   | Os05g0566800 | 2.05**  | 1.02E-02 | 4.76**  | 3.67E-03 |
| Stress-responsive protein                                             | Os01g0516400 | 0.35**  | 3.9E-02  | 0.32**  | 9.50E-04 |
| Universal stress protein                                              | Os05g0417400 | 7.79**  | 1.91E-02 | 9.87**  | 2.65E-04 |

|                                                                                |              |         |          |         |          |
|--------------------------------------------------------------------------------|--------------|---------|----------|---------|----------|
| <b>Nucleotide transport and metabolism</b>                                     |              |         |          |         |          |
| Leucyl-tRNA synthetase                                                         | Os05g0241100 | 0.33**  | 3.13E-04 | 0.33**  | 7.56E-04 |
| ATP-diphosphohydrolase                                                         | Os11g0125900 | 2.24**  | 4.06E-02 | 3.45**  | 3.66E-03 |
| Deoxynucleoside kinase family protein                                          | Os05g0124700 | 39.15** | 2.40E-05 | 78.03** | 4.73E-04 |
| ATP-diphosphatase                                                              | Os12g0123500 | 2.03**  | 2.78E-02 | 4.32**  | 3.57E-05 |
| Adenine phosphoribosyltransferase                                              | Os02g0613900 | 3.80**  | 5.41E-03 | 4.56**  | 3.20E-04 |
| <b>Cell wall/membrane/envelope biogenesis</b>                                  |              |         |          |         |          |
| Glycine-rich cell wall structural protein                                      | Os10g0450900 | 2.18**  | 1.43E-02 | 3.78**  | 6.45E-03 |
| Beta-expansin-3 ( <i>OsEXPB3</i> )                                             | Os10g0555900 | 8.94**  | 4.13E-02 | 16.09** | 9.53E-04 |
| Alpha-expansin ( <i>OsEXPA4</i> )                                              | Os05g0477600 | 2.39**  | 3.42E-02 | 4.50**  | 8.67E-04 |
| Actin filament bundling protein                                                | Os04g0604000 | 2.34**  | 1.72E-02 | 2.20**  | 3.45E-03 |
| <b>General function prediction only</b>                                        |              |         |          |         |          |
| Laccase-7                                                                      | Os01g0850700 | 11.03** | 7.32E-03 | 16.78** | 7.56E-04 |
| Protein kinase                                                                 | Os11g0470200 | 0.4**   | 4.22E-02 | 0.43**  | 3.66E-03 |
| Protein kinase                                                                 | Os07g0147600 | 2.56**  | 4.39E-05 | 3.45**  | 4.73E-04 |
| BTB domain containing protein                                                  | Os04g0482300 | 3.95**  | 2.80E-03 | 9.76**  | 3.57E-05 |
| Protein kinase                                                                 | Os04g0689400 | 2.94**  | 7.80E-03 | 4.09**  | 9.56E-04 |
| Major QTL controlling low-temperature germinability in rice ( <i>qLTG3-1</i> ) | Os03g0103300 | 3.26**  | 3.03E-01 | 6.65**  | 4.66E-03 |
| Similar to USP family protein                                                  | Os05g0453700 | 3.59**  | 4.34E-02 | 7.88**  | 3.20E-04 |
| Rac-like GTP-binding protein                                                   | Os06g0234200 | 2.18**  | 2.79E-04 | 3.45**  | 6.45E-03 |
| Hypothetical protein                                                           | Os12g0113600 | 50.61** | 4.85E-04 | 78.56** | 4.53E-04 |
| Reticulon family protein                                                       | Os01g0139000 | 2.33**  | 2.42E-02 | 2.09**  | 3.45E-03 |



|                                                   |              |          |          |          |          |
|---------------------------------------------------|--------------|----------|----------|----------|----------|
| Hypothetical protein                              | Os05g0296800 | 5.74**   | 1.19E-02 | 9.84**   | 2.10E-03 |
| Protein of unknown function DUF6                  | Os04g0422300 | 365.77** | 2.39E-06 | 200.78** | 1.23E-04 |
| NB-ARC domain containing protein                  | Os06g0163900 | 8.70**   | 5.07E-04 | 7.89**   | 4.50E-04 |
| DNA-binding domain containing protein             | Os02g0648300 | 2.61**   | 7.05E-03 | 4.98**   | 3.22E-04 |
| FAS1 domain containing protein                    | Os08g0502400 | 4.47**   | 1.27E-02 | 7.76**   | 3.45E-04 |
| <b>Replication, recombination, and repair</b>     |              |          |          |          |          |
| RNA-binding protein                               | Os06g0141200 | 2.23**   | 4.46E-02 | 3.45**   | 9.27E-05 |
| Homeobox-leucine zipper protein                   | Os03g0170600 | 2.45**   | 1.89E-02 | 6.76**   | 5.53E-03 |
| DEAD-box RNA helicase DEAD3                       | Os06g0602400 | 19.19**  | 7.51E-03 | 45.37**  | 3.23E-04 |
| DEAD-like helicase                                | Os07g0647900 | 3.09**   | 4.79E-04 | 6.37**   | 3.45E-03 |
| <b>Signal transduction mechanisms</b>             |              |          |          |          |          |
| A-type response regulator 1, cytokinin signalling | Os04g0442300 | 2.71**   | 3.92E-02 | 4.34**   | 2.30E-02 |
| Rice SPX domain gene ( <i>OsSPX1</i> )            | Os02g0202200 | 0.33**   | 7.29E-04 | 0.23**   | 6.54E-03 |
| <b>Energy production and conversion</b>           |              |          |          |          |          |
| Glycoside hydrolase                               | Os01g0813800 | 2.88**   | 2.29E-02 | 4.55**   | 5.33E-05 |
| Glucose/ribitol dehydrogenase                     | Os02g0511400 | 4.38**   | 7.06E-04 | 5.67**   | 6.35E-03 |
| Alcohol dehydrogenase-like protein                | Os07g0592100 | 2.36**   | 4.87E-03 | 4.66**   | 1.06E-03 |
| Glucose-1-phosphate adenylyltransferase           | Os09g0298200 | 2.02**   | 1.75E-02 | 1.99**   | 7.09E-04 |
| Glucan endo-1,3-beta-glucosidase GV               | Os01g0946500 | 3.87**   | 2.93E-02 | 3.98**   | 4.90E-03 |
| Transferase                                       | Os10g0133500 | 3.91**   | 7.98E-04 | 6.54**   | 4.57E-03 |
| Myo-inositol oxygenase                            | Os06g0561000 | 2.57**   | 6.02E-03 | 5.43**   | 3.34E-03 |

**Supplemental Table S5.** Primer sequences used for PCR and quantitative real-time RT-PCR

| Gene                                                 | Accession Number | Forward Sequence (5'-3')  | Reverse Sequence (5'-3')  |
|------------------------------------------------------|------------------|---------------------------|---------------------------|
| <b><i>Genes used to create transgenic plants</i></b> |                  |                           |                           |
| <i>AtSUC2</i> -vector                                | At1G22710        | TGCCATGGATATGGTCAGCCATCCA | CGGGTAACCCTGCTAAAATTCAATG |
| <i>AtSUC2</i> -RT-PCR                                | At1G22710        | GCGAGCCATA GCGATATTCG     | GTAAGATCCC GCAGCGTAAC     |
| <i>Actin 1</i>                                       | Os03g0718100     | CCCTCCTGAAAGGAAGTACAGTGT  | GTCCGAAGAATTAGAAGCATTTC   |
| <b><i>Genes involved in starch biosynthesis</i></b>  |                  |                           |                           |
| <i>BEI</i>                                           | Os06g0726400     | GGCATTGCACTCCAAAAGAT      | GCTCCAGTTGTTGCCTTCTC      |
| <i>BEIIa</i>                                         | Os02g0528200     | GCCAATGCCAGGAAGATGA       | GCGCAACATAGGATGGGTTT      |
| <i>BEIIb</i>                                         | Os02g0528200     | ATGCTAGAGTTTGACCGC        | AGTGTGATGGATCCTGCC        |
| <i>APGL1</i>                                         | Os05g0580000     | CATCAAGGACGGGAAGGTCA      | ACTTCACTCGGGGCAGCTTA      |
| <i>APGL2</i>                                         | Os01g0633100     | CTGAGGAAGAGGTGCTTTGG      | TCTTTCGGGAGGATTGTGTC      |
| <i>APGL3</i>                                         | Os03g0735000     | GACCATTTGCGGCAGGAATA      | TGGAACAACCAATACCCAG       |
| <i>AGPL4</i>                                         | Os07g0243200     | TCCCTTCTGGTTTGTTCATTT     | CCAAAACGTTCTTGCCATGC      |
| <i>AGPS1</i>                                         | Os09g0298200     | AGAATGCTCGTATTGGAGAAAATG  | GGCAGCATGGAATAAACCAC      |
| <i>AGPS2a</i>                                        | Os08g0345800     | AGTAGTGGGACTCCGGTCCT      | ATGCCACCTTTTTACCAAG       |
| <i>AGPS2b</i>                                        | Os08g0345800     | AACAATCGAAGCGCGAGAAA      | GCCTGTAGTTGGCACCAG        |
| <i>SSI</i>                                           | Os06g0160700     | TCATGGATGTGAAGGAGCAA      | TGGCAGTGAACCACAAACAT      |
| <i>SSIIa</i>                                         | Os06g0229800     | GATCGACCAGGATGACGATT      | GGGTAAAGCACCTGCAACAT      |
| <i>SSIIb</i>                                         | Os02g0744700     | CGGA ACTACAAGGAGAGCTGGA   | GTGCCGCCGTCTCAGCAG        |
| <i>SSIIc</i>                                         | Os10g0437600     | CGTGGCCATTAGATGACTT       | CAGTAAGCAAACGGTCAGCA      |
| <i>SSIIIa</i>                                        | Os08g0191500     | GCCTGCCCTGGACTACATTG      | GCAAACATATGTACACGGTTCTGG  |
| <i>SSIIIb</i>                                        | Os04g0624600     | ATTCCGCTCGCAAGAACTGA      | CAACCGCAGGATAACGGAAA      |
| <i>SSIVa</i>                                         | Os01g0720600     | GGGAGCGGCTCAAACATAAA      | CCGTGCACTGACTGCAAAT       |
| <i>SSIVb</i>                                         | Os05g0533600     | GAGCTGCTCCTGCTCAAGAT      | ACACAATTGCACCCTTGACA      |
| <i>GBSSI</i>                                         | Os06g0133000     | TCCGAGAGGTT CAGGTCATC     | TCCGAGAGGTT CAGGTCATC     |

|                                                               |              |                         |                        |
|---------------------------------------------------------------|--------------|-------------------------|------------------------|
| <i>GBSSII</i>                                                 | Os07g0412100 | AAACGGGCTCTGAAGCAGTA    | CTCCTCCCCTTCTTTGCAG    |
| <i>ISA2</i>                                                   | Os05g0395300 | TAGAGGTCCTCTTGGAGG      | AATCAGCTTCTGAGTCACCG   |
| <i>ISA3</i>                                                   | Os09g0468700 | ACAGCTTGAGACACTGGGTTGAG | GCATCAAGAGGACAACCATCTG |
| <i>Susy1</i>                                                  | Os06g0194900 | AATGGTATCCTCCGCAAGTG    | GGCTTGCATTTCCCTCATAA   |
| <i>Susy2</i>                                                  | Os03g0401300 | GCTGAAGGACAGGAACAAGC    | CACCACAGACAACCACAAGG   |
| <i>Susy3</i>                                                  | Os07g0616800 | CATGTACCCCCTGCTCAACT    | GTCAGCTGTAATGCCTGCAA   |
| <i>PPDKB</i>                                                  | Os05g0405000 | CATGCACTGTTGAGGAGAA     | GGGAAATGGCTCTCCCTTAG   |
| <i>PGIa</i>                                                   | Os09g0465600 | TCAGCATGCCTACATTCAGC    | TGCAACATCCCGAACAAATA   |
| <i>PGIb</i>                                                   | Os06g0256500 | GTTGCACGAAGCATCAAAGA    | ATGTTTCGCAACAGCATCAG   |
| <i>Amy3B</i>                                                  | Os09g0457500 | TCCTTATCGCCTTGCTCTGT    | GAAGCGTCCAGGTCGTAGAG   |
| <i>Amy3C</i>                                                  | Os09g0457800 | CTGGCTCCACACAGAACTCA    | CGTAGACATCTCCGTCAGCA   |
| <i>Amy3D</i>                                                  | Os08g0473900 | GTCGACGAGAAGGTCATGGT    | CCTTCTCCCAGACGCTGTAG   |
| <i>Amy3E</i>                                                  | Os08g0473600 | ACAAGGTCATGCAGGGCTAC    | GTTCTTGACCGGATTTTCAG   |
| <b><i>Genes involved in sucrose biosynthesis</i></b>          |              |                         |                        |
| <i>SPP</i>                                                    | Os01g0376700 | TTGATGTTAAAATAAT        | ATGACACCATGTACACCAG    |
| <i>UGP1</i>                                                   | Os01g0264100 | ATGTCGTCGGAGGCGCGGG     | CGGCGGCGGAGGAGGAGCG    |
| <i>UGP2</i>                                                   | Os02g0117700 | AGGAGCATGTGGAATGGGCA    | TGGTCCGGTGCATCCCAT     |
| <i>SPS1</i>                                                   | Os01g0702900 | CGGCGTGCAGGTGGATCTCG    | TGCTTACGCACCCGAG       |
| <i>SPS2</i>                                                   | Os02g0184400 | ATGTGGTTGAACTTGCTAAA    | GATATGGCCAAGTGCACC     |
| <i>SPS6</i>                                                   | Os06g0634800 | TCTTCAGCGGCCTCCTCCGC    | GCGCCGACTCCGACGAC      |
| <i>cyFBP1</i>                                                 | Os01g0866400 | ATGGATCACGAGGCGGACG     | TTGTTGACGGCGGAGGCGAC   |
| <i>PFPA</i>                                                   | Os02g0714200 | GTGGAAGTGATGGTCTTCTC    | CAATGATTACTAAAGCATCC   |
| <i>PPase</i>                                                  | Os01g0866500 | GAGCGAGGCGGACGGAGGCG    | GTGTCGAGGTCGTGCCAGG    |
| <b><i>Genes involved in production of storage protein</i></b> |              |                         |                        |
| <i>GluA1</i>                                                  | Os01g0762500 | CATTTGAGCCAATTCGGAGT    | GGCCTGATTGTTGGAAGTGT   |

|                                                       |              |                          |                        |
|-------------------------------------------------------|--------------|--------------------------|------------------------|
| <i>GluA2</i>                                          | Os10g0400200 | GCAAGAGCAGGAACAAGGAC     | CCTCATGGTGCAAAGGTCT    |
| <i>GluA3</i>                                          | Os03g0427300 | TGAAAACCAACCCTGACTCC     | ACTCATCTCCCCTGTTGTGC   |
| <i>GluB1</i>                                          | Os02g0249800 | GCCAAAGTCAGAGCCAAAAG     | GAACCAATGTGCAACACCAG   |
| <i>GluB4</i>                                          | Os02g0242600 | GCGACCAGAAGGCTACAAAG     | TTGCTTGTTGATCGTTGCTC   |
| <i>Globulin1</i>                                      | Os03g0663800 | ATCGAGAACGGCGAGAAGT      | GGACGGAGATGGTATGGAGA   |
| <i>Globulin2</i>                                      | Os03g0793700 | CGACGAGGTGTTCTACGTCA     | GTGTTGGCGGAGTAGACGAT   |
| <i>11s-Globulin</i>                                   | Os05g0116000 | CACCAAACCCGATCTTCAGT     | CGGAACAGCTTCTCCATCTC   |
| <i>19kD-Globulin</i>                                  | Os08g0498400 | GCCAGTAATTGCAGGGGATA     | AGGTCACCACCAACGTAAGC   |
| <i>10kD-Prolamin</i>                                  | Os03g0766100 | TGCAGTATTTCCCAACAACA     | ACATGAACATGGCTGTGGAG   |
| <i>13kD-Prolamin</i>                                  | Os07g0219400 | CACAGCGCAGTTTGATGTTT     | GCTTGCCGCAATGCTATACT   |
| <i>17kD-Prolamin</i>                                  | Os06g0507001 | TTTGATGCTTGCACCTATGG     | GCAGCTGCTCAGTTTTAGCC   |
| <i>RA16</i>                                           | Os07g0214600 | AGGTAGTGATCTCGGCCGTTG    | CCGATTCCCTGGCTGACATAG  |
| <i>RA17</i>                                           | Os03g0791200 | TTCTCGGTATTGCTCCTCGT     | CTTATTCCCTGGCCGACATTG  |
| <i>RA5B</i>                                           | Os07g0215500 | TGGCTTCCAACAAGGTAGTG     | ACCTGGTCTTGGTGGTGGTA   |
| <i>RAG2</i>                                           | Os07g0214300 | AGGTAGTGTTCTCGGCCGTTG    | GTACATCGGGTAGCCCATTC   |
| <i>RG21</i>                                           | Os02g0268100 | TGGCGACCATAGCTTTCTCT     | GGGTTGTGCCATGGATTTAC   |
| <i>AlaAT</i>                                          | Os10g0390500 | CCATTTCTCGAGCAACAACA     | ATTTGCAGGGTATCCGTCAC   |
| <i>PDI</i>                                            | Os11g0199200 | ACCAGGGCAAGAACATTAG      | TTGCGTCTTCTGGTGACTTG   |
| <b><i>Genes involved in regulating grain size</i></b> |              |                          |                        |
| <i>GS3</i>                                            | Os03g0407400 | ACGATTTTCATCGGAGAAGCGAAG | CAGCAGCAGATCCAGGAGAG   |
| <i>GS5</i>                                            | Os05g0158500 | CATTCCATGCAAATGCCAGTGGAC | CAGCCCTGCTTTGATGAGCTTG |
| <i>GW2</i>                                            | Os02g0244100 | CAGCAGCGCATTCCCAGTTTTC   | GTGGTCAGCCGAGCACTCTC   |
| <i>GW8</i>                                            | Os08g0531600 | AGGAGTTTGATGAGGCCAAG     | GCGTGTAGTATGGGCTCTCC   |
| <i>GIF1</i>                                           | Os04g0413500 | CTCAGTGTCA CGTGACCTCA    | GAAGTGCCTCGCGTTGATGC   |
| <i>DEP1</i>                                           | Os09g0441900 | GCGAGATCACGTTCTCAAG      | TGCAGTTTGGCTTACAGCAT   |

|                                            |              |                           |                           |
|--------------------------------------------|--------------|---------------------------|---------------------------|
| <i>OsSPL14</i>                             | Os08g0509600 | CAGCTACCACATGAAGTC        | CTACAGAGACCAATCCATC       |
| <i>SRS1/DEP2</i>                           | Os07g0616000 | GAGGTGGAGC AATGTAAGTG     | CATGATGTAACTGCATGCTT      |
| <i>SRS-3</i>                               | Os05g0154700 | GCAACAGCAACAACGGCCGAC     | TGTGTGCTGCTATGAGAGCCTCC   |
| <i>DEP3</i>                                | Os06g0677000 | GCTCTCCGGG AACCCCGATG     | TTCTTGAACACCGACTCCGG      |
| <i>SG1</i>                                 | Os09g0459200 | CCCAGATGGATCTTGGAGGT      | GGCAGACAGCAAGCTGAAAG      |
| <b><i>Genes involved in cell cycle</i></b> |              |                           |                           |
| <i>CAK1</i>                                | Os06g0171700 | GACGGTCAGATTAGACGCAAGA    | TCCAAAGGATGTCCACA         |
| <i>CAK1A</i>                               | Os06g0334400 | GACCGACAAGGGTTTCAGCAT     | CCAGCATGTTTCAGGAAGATACAAT |
| <i>CDC20</i>                               | Os04g0599800 | TCGAATCACCTGTTTGTGGC      | TGGAGACAATCCAACGCAAAG     |
| <i>CDKA1</i>                               | Os03g0118400 | GGTTTGGACCTTCTCTCTAAAATGC | AGAGCCTGTCTAGCTGTGATCCTT  |
| <i>CDKA2</i>                               | Os02g0123100 | CGAGATTTGAAGCCCCAGAA      | TCCGCGAGCTTCAATGAGTT      |
| <i>CDKB</i>                                | Os08g0512600 | AAGTTTGGCCAGGAGTGAGCA     | TCAAGAGCATCAGCGTCGAGA     |
| <i>CDT2</i>                                | Os03g0699100 | AACCGCACCAAACACTGGAA      | GCAATTCACCATCTGCACTGG     |
| <i>CYCA2.1</i>                             | Os12g0581800 | AGGTTGTCAAGATGGAGAGCGA    | CGCTTTTTGTCTTCCTGGCA      |
| <i>CYCA2.2</i>                             | Os12g0502300 | AGGTTGTCAAGATGGAGAGCGA    | CGCTTTTTGTCTTCCTGGCA      |
| <i>CYCA2.3</i>                             | Os01g0233500 | GTTTCGGTTGACGAGACGATGT    | CGCTGCAAGGAACCTAGAACTG    |
| <i>CYCB2.1</i>                             | Os04g0563700 | AAGTTTGGCCAGGAGTGAGCA     | TCAAGAGCATCAGCGTCGAGA     |
| <i>CYCB2.2</i>                             | Os06g0726800 | CTCAAGGCTGCACAATCTGACA    | GCATTGACGGCTGGAATTTG      |
| <i>CYCD3</i>                               | Os11g0706801 | CCTTCCACACTGACGGTACAGT    | TGCCGCTGCCAAATAGACA       |
| <i>CYCD4</i>                               | Os09g0466100 | GCCATGGAGTTGATACATCCAA    | CCAGTAGGGCTCCGTGGAAT      |
| <i>CYCl<sub>a</sub>Zm</i>                  | Os01g0805600 | CACTCTCAAGCACCACACTGGA    | ACAACCCTCAGCTTGCTCTCAG    |
| <i>CYCT1</i>                               | Os02g0438200 | GCATTTGTTGCAGCTCAAG       | TCACCACTTCGCTGACTTATTG    |
| <i>E2F2</i>                                | Os12g0158800 | TGTTGGTGGCTGCCGATAT       | CGCCAGGTGCACCCTTT         |
| <i>H1</i>                                  | Os04g0253000 | GCAAGGCACCTGCAGCTT        | AGGCAGCCTTTGTACAGATCCT    |
| <i>KN</i>                                  | Os03g0736500 | CACCAGCTTCAAGAGATCGTGA    | CCGGAATTGAGACACAACCTGC    |

|                                             |                |                          |                             |
|---------------------------------------------|----------------|--------------------------|-----------------------------|
| <i>MAD2</i>                                 | Os04g0486500   | GAGCCATGCATATTCGACGTG    | GGTGTCTGAAGGAATGCAGCTT      |
| <i>Genes involved in C and N transports</i> |                |                          |                             |
| <i>OsSUT1</i>                               | Os03g0170900   | TCATCCCTCAGGTGGTCATCG    | CTTGGAGATCTTGGGCAGCAG       |
| <i>OsSUT2</i>                               | Os12g0641400   | GGCGGCCT AGCGGCGGCG      | CGAAGGCGTGCGGGATGC          |
| <i>OsSUT3</i>                               | Os10g0404500   | CCGTCGACAT GGAGCTCGA     | AACGTACGGGGTGAGGAGA         |
| <i>OsSUT4</i>                               | Os02g0827200   | CGCCGGCGGT GGCGGCCTCA    | CGTGAGGAGCGAGAGCTGA         |
| <i>OsSUT5</i>                               | Os02g0576600   | CTAGTGCGAAACTCCATCAA     | AAAATATTTGGGTTTCTGAGAT      |
| <i>OsSWEET11</i>                            | Os08g0535200   | GACGTTCTTG CAGGTGTACA    | TAGCGGACGATGTAGGCGGC        |
| <i>OsSWEET14</i>                            | Os11g0508600   | TTCCAACG TGCTGGGCTT CT   | GCACCTCGCGGGTCTTGACG        |
| <i>OsTPT1</i>                               | Os01g0239200   | ACAACATGGGCGAGGATCAT     | CAATCTTACCACCGCAATATGC      |
| <i>OsTPT2</i>                               | Os05g0241200   | TAGTTGGGTAGCTGCTTTGATCGA | AAATGGGATGATGGAGGCTTTG      |
| <i>OsMT</i>                                 | Os04g0602400   | GCTGCCAGGCAGGAAGCT       | GGTTCCAGTTTCACCACGACA       |
| <i>OspGlcT</i>                              | Os01g0133400   | GGTTCCAGTTTCACCACGACA    | CGGTGGCATACTGGCATCTA        |
| <i>OsGPT1</i>                               | Os08g0187800   | GCAAGCACTGAGGCCAATTTTG   | AAGGAACAAGAAACGAGCAACATAGAC |
| <i>OsGPT2-1</i>                             | LOC_Os07g34010 | ACTCGGTGCTCGGGATGTAAC    | AGAAGAAACATTGGCAGCTACAC     |
| <i>OsGPT2-2</i>                             | LOC_Os07g33960 | ACTCGGTGCTCGGGATGTAAC    | AGAAGAAACATTGGCAGCTACAC     |
| <i>OsGPT2-3</i>                             | Os07g0523400   | GGATTGAAGAAGACTCGATGCGA  | GGCTTGAATAATGCCATCTTGG      |
| <i>OsBT1-1</i>                              | Os02g0202400   | CTGGAATCGGATGAAACTCGTGTA | TCAGCAGAAATCAGTTATTGGACATG  |
| <i>OsBT1-2</i>                              | Os05g0171300   | TGATTGTGCATGGGTGTGATG    | AACAGAGGAAATCGAATCCTACG     |
| <i>OsBT1-3</i>                              | Os06g0602700   | TTGCTAGCGTCGGTCTCAAAG    | GCAATGATCAGCGAACGGAA        |
| <i>OsAAP7</i>                               | Os05g0424000   | ATCAAGCGGGCGAACTGCT      | TGCACGACGCCGAGGCCG          |
| <i>OsAAP8</i>                               | Os01g0882800   | GTCGCTGGGGTGGGCCATCG     | GCTCAGGTTGGCGTTCAC          |
| <i>OsAAP11</i>                              | Os11g0195600   | CGGGCGGGCG CGGCGGATGG    | CCATCCGCCGCGCCCG            |
| <i>OsLHT1</i>                               | Os08g0127100   | GCTGTGGCAGATGGTGGAGA     | TTCTCGCCGAACGCGTGC          |
| <i>OsATL5</i>                               | Os06g0633800   | CAGCAGCGAATCGCCGAATG     | CCCGGAAAATGAAGCTCCAT        |

|                 |              |                      |                      |
|-----------------|--------------|----------------------|----------------------|
| <i>OsATL6</i>   | Os02g0191300 | GGAATTGGGAATGGATCACC | ACTGACCGGAGAAAGAAGC  |
| <i>OsCAT4</i>   | Os03g0654400 | TGGATGGCGGCGGCGAGGTT | GATCGCGACCAGCGCCGG   |
| <i>OsCAT11</i>  | Os12g0623500 | TCGAGGAAGGCGGCGCGATG | CAATCGCGACGAGCTGCGT  |
| <i>OsPTR1</i>   | Os07g0100600 | GGAGGCGACGACGACTGAC  | GCCAGGCGCTCGCAGCACTC |
| <i>OsPTR7</i>   | Os01g0142600 | GTACACATCTCACCGGT A  | GAAGCGTCAAATCCAAAACG |
| <i>OsNRT2.3</i> | Os01g0704100 | ATGGAGGCTAAGCCGGTG   | ACCACGCCATGTGGAAGGA  |
| <i>OsAMT1.1</i> | Os04g0509600 | AAGATGGCGACGTGCGCGGC | CATGGCGAACACGAGGTACG |
| <i>OsAMT1.2</i> | Os02g0620500 | GCGGCCAACTACATCTGCAA | GCGAACACGAGGTAGGCCG  |
| <i>OsAMT1.3</i> | Os02g0620600 | GACGTCGGCCGTGGACTCGA | CGTCGAGCACGTTGGAAGC  |
